# Supplementary material
Source: PubMed Central journal article supplement (PMC8206382)
Supplement: mmc3.pdf [file mmc3.pdf]

# Bi-allelic premature truncating variants in *LTBP1* cause cutis laxa syndrome

Lore Pottier,<sup>1,2</sup> Christin S. Adamo,<sup>3,4,22</sup> Aude Beyens,<sup>1,2,5,22</sup> Steffen Lütke,<sup>3,4</sup> Piyanoot Tapaneeyaphan,<sup>1,2</sup> Adelbert De Clercq,<sup>1,2</sup> Phil L. Salmon,<sup>6</sup> Riet De Rycke,<sup>7,8,9</sup> Alper Gezdirici,<sup>10</sup> Elif Yilmaz Gulec,<sup>11</sup> Naz Khan,<sup>12,13</sup> Jill E. Urquhart,<sup>12,13</sup> William G. Newman,<sup>12,13</sup> Kay Metcalfe,<sup>13</sup> Stephanie Efthymiou,<sup>14</sup> Reza Maroofian,<sup>14</sup> Najwa Anwar,<sup>15</sup> Shazia Maqbool,<sup>15</sup> Fatima Rahman,<sup>15</sup> Ikhlass Altweijri,<sup>16</sup> Monerah Alsaleh,<sup>17</sup> Sawsan Mohamed Abdullah,<sup>18</sup> Mohammad Al-Owain,<sup>18,19</sup> Mais Hashem,<sup>18</sup> Henry Houlden,<sup>14</sup> Fowzan S. Alkuraya,<sup>18,19</sup> Patrick Sips,<sup>1,2</sup> Gerhard Sengle,<sup>3,4,20,21</sup> and Bert Callewaert<sup>1,2,\*</sup>

## Summary

Latent transforming growth factor  $\beta$  (TGF $\beta$ )-binding proteins (LTBPs) are microfibril-associated proteins essential for anchoring TGF $\beta$  in the extracellular matrix (ECM) as well as for correct assembly of ECM components. Variants in *LTBP2*, *LTBP3*, and *LTBP4* have been identified in several autosomal recessive Mendelian disorders with skeletal abnormalities with or without impaired development of elastin-rich tissues. Thus far, the human phenotype associated with *LTBP1* deficiency has remained enigmatic. In this study, we report homozygous premature truncating *LTBP1* variants in eight affected individuals from four unrelated consanguineous families. Affected individuals present with connective tissue features (cutis laxa and inguinal hernia), craniofacial dysmorphology, variable heart defects, and prominent skeletal features (craniosynostosis, short stature, brachydactyly, and syndactyly). *In vitro* studies on proband-derived dermal fibroblasts indicate distinct molecular mechanisms depending on the position of the variant in *LTBP1*. C-terminal variants lead to an altered *LTBP1* loosely anchored in the microfibrillar network and cause increased ECM deposition in cultured fibroblasts associated with excessive TGF $\beta$  growth factor activation and signaling. In contrast, N-terminal truncation results in a loss of *LTBP1* that does not alter TGF $\beta$  levels or ECM assembly. *In vivo* validation with two independent zebrafish lines carrying mutations in *ltbp1* induce abnormal collagen fibrillogenesis in skin and intervertebral ligaments and ectopic bone formation on the vertebrae. In addition, one of the mutant zebrafish lines shows voluminous and hypo-mineralized vertebrae. Overall, our findings in humans and zebrafish show that *LTBP1* function is crucial for skin and bone ECM assembly and homeostasis.

## Introduction

Latent transforming growth factor  $\beta$  (TGF $\beta$ )-binding proteins (LTBPs) are microfibril-associated multidomain proteins essential for the sequestration of TGF $\beta$  in the extracellular matrix (ECM). Mature TGF $\beta$  growth factor dimers associate non-covalently with the latency-associated peptide (LAP) in order to form the small latent complex (SLC), which is covalently tethered via two disulfide-bridges to LTBPs.<sup>1</sup> SLCs of the three human TGF $\beta$  isoforms were shown to bind to *LTBP1* and *LTBP3*, while TGF $\beta$ 1 SLC exclu-

sively interacts with *LTBP4*.<sup>2</sup> Most LTBPs are targeted to the ECM via their amino- and carboxy-terminal regions. *LTBP1*, *LTBP2*, and *LTBP4* interact through their C-terminal region with fibrillin-1 (FBN1),<sup>3–5</sup> while the N-terminal region of *LTBP1* and *LTBP4* interact with fibronectin (FN).<sup>6,7</sup> Moreover, *LTBP4* facilitates the deposition of tropoelastin onto the microfibrillar scaffold through interaction with fibulin-4 (EGF-containing fibulin extracellular matrix protein 2: EFEMP2) and fibulin-5 (FBLN5).<sup>8–13</sup> Similar to *LTBP4*, *LTBP2* facilitates the deposition of tropoelastin onto the microfibrillar scaffold through interaction with

<sup>1</sup>Center for Medical Genetics Ghent, Ghent University Hospital, Ghent 9000, Belgium; <sup>2</sup>Department of Biomolecular Medicine, Ghent University, Ghent 9000, Belgium; <sup>3</sup>Center for Biochemistry, Faculty of Medicine and University Hospital Cologne, University of Cologne, Cologne 50931, Germany; <sup>4</sup>Department of Pediatrics and Adolescent Medicine, Faculty of Medicine and University Hospital Cologne, University of Cologne, Cologne 50931, Germany; <sup>5</sup>Department of Dermatology, Ghent University Hospital, Ghent 9000, Belgium; <sup>6</sup>Bruker microCT, Kontich 2550, Belgium; <sup>7</sup>Department of Biomedical Molecular Biology, Ghent University, Ghent 9052, Belgium; <sup>8</sup>VIB Center for Inflammation Research, Ghent 9052, Belgium; <sup>9</sup>Ghent University Expertise Centre for Transmission Electron Microscopy and VIB Bioimaging Core, Ghent 9052, Belgium; <sup>10</sup>Department of Medical Genetics, Basaksehir Cam and Sakura City Hospital, Istanbul 34480, Turkey; <sup>11</sup>Department of Medical Genetics, Kanuni Sultan Suleyman Training and Research Hospital, Health Sciences University, Istanbul 34303, Turkey; <sup>12</sup>Division of Evolution and Genomic Sciences, School of Biological Sciences, Faculty of Biology, Medicine and Health, University of Manchester, Manchester M13 9WL, UK; <sup>13</sup>Manchester Centre for Genomic Medicine, St Mary's Hospital, Manchester University NHS Foundation Trust, Manchester M13 9WL, UK; <sup>14</sup>Department of Neuromuscular Disorders, UCL Institute of Neurology, London WC1N 3BG, UK; <sup>15</sup>Development and Behavioral Pediatrics Department, Institute of Child Health and The Children Hospital, Lahore 54000, Pakistan; <sup>16</sup>Department of Neurosurgery, King Khalid University Hospital, Riyadh 11211, Saudi Arabia; <sup>17</sup>Heart Centre, King Faisal Specialist Hospital and Research Center, Riyadh 11211, Saudi Arabia; <sup>18</sup>Department of Translational Genomics, Center for Genomic Medicine, King Faisal Specialist Hospital and Research Center, Riyadh 11211, Saudi Arabia; <sup>19</sup>Department of Anatomy and Cell Biology, College of Medicine, Alfaisal University, Riyadh 11211, Saudi Arabia; <sup>20</sup>Center for Molecular Medicine Cologne, University of Cologne, Robert-Koch-Street 21, Cologne 50931, Germany; <sup>21</sup>Cologne Center for Musculoskeletal Biomechanics, Cologne 50931, Germany

<sup>22</sup>These authors contributed equally

\*Correspondence: [bert.callewaert@ugent.be](mailto:bert.callewaert@ugent.be)

<https://doi.org/10.1016/j.ajhg.2021.04.016>

© 2021 American Society of Human Genetics.

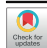

fibulin-5.<sup>14</sup> Dysfunction of any member of the LTBP superfamily has multiple consequences on the TGF $\beta$  bioavailability and elastic fiber assembly in various tissues both *in vitro* and *in vivo*.<sup>9–11,15–19</sup>

Pathogenic variants in *LTBP* genes have been identified in several autosomal recessive (AR) Mendelian disorders presenting with impaired development of the skeleton and/or elastin-rich tissues. Pathogenic variants in *LTBP2* cause AR primary congenital glaucoma (MIM: 613086), AR microspherophakia and/or megalocornea, with ectopia lentis and with or without secondary glaucoma (MIM: 251750), and AR Weill-Marchesani syndrome (MIM: 614819).<sup>20–22</sup> Pathogenic variants in *LTBP3* cause AR platyspondyly with amelogenesis imperfecta (MIM: 601216) and geleophysic dysplasia 3 (MIM: 617809).<sup>23,24</sup> In addition, homozygous loss-of-function (LOF) variants in *LTBP3* were reported in syndromic forms of thoracic aortic aneurysm and dissection (TAAD).<sup>25</sup> Finally, pathogenic variants in *LTBP4* cause AR cutis laxa (CL) type 1C, characterized by loose redundant skin folds, emphysema, and diverticula of the gastrointestinal and urinary tract.<sup>26–28</sup> Thus far, the human phenotype associated with *LTBP1* (MIM: 150390) deficiency has remained enigmatic.

Nevertheless, the molecular consequences of *Ltbp1* deficiency have been studied in mice. In most vertebrates, *LTBP1* encodes two alternatively spliced isoforms: a long (*LTBP1L*) and a short (*LTBP1S*) isoform. Mice lacking *Ltbp1L* only or both *Ltbp1S* and *Ltbp1L* show a persistent truncus arteriosus and an interrupted aortic arch that associates with perinatal lethality.<sup>15,29</sup> At the embryonal stage, the outflow tract of *Ltbp1L*<sup>-/-</sup> mouse hearts show decreased TGF $\beta$  activity.<sup>15</sup> Mice lacking *Ltbp1S* while still retaining expression of an alternatively spliced form of *Ltbp1L* ( $\Delta 55$  variant) are viable, show mild craniofacial and skeletal abnormalities and impaired ovarian function, and are less prone to hepatic fibrosis after bile duct ligation, which was attributed to decreased bio-availability of TGF $\beta$ .<sup>29–31</sup> Together, data from animal studies indicate that *Ltbp1L*, and hence intact TGF $\beta$  signaling, is required for proper embryonal cardiovascular development, while *Ltbp1S* could play a role in craniofacial development.<sup>15,29,30</sup>

Here, we report homozygous premature truncating *LTBP1* variants in eight affected individuals from four unrelated consanguineous families. Affected individuals present with cutis laxa, craniofacial dysmorphism, mild variable heart defects, and altered skeletal development, including short stature, craniosynostosis, brachydactyly, clinodactyly, and syndactyly, which we propose to coin as *LTBP1*-related CL syndrome.<sup>32</sup> *In vitro* studies on proband dermal fibroblasts indicate distinct molecular consequences and effects on TGF $\beta$  signaling depending on the position of the variant in *LTBP1*. For *in vivo* validation, we generated and characterized *ltbp1*<sup>-/-</sup>  $\Delta 29$  and *ltbp1*<sup>-/-</sup>  $\Delta 35$  zebrafish. We found abnormal collagen fibrillogenesis in the skin and in the intervertebral ligaments. In addition, *ltbp1*<sup>-/-</sup>  $\Delta 29$  zebrafish show hypo-mineralized vertebrae

with ectopic bone formation and increased vertebral volume. These observations were not investigated in the majority of the affected individuals. Our data indicate that *LTBP1* has dual functions in humans and zebrafish affecting cutaneous and skeletal development.

## Subjects and methods

### Clinical assessment

Informed consents were obtained from all individuals or from their parents in the case of minor individuals, including specific consent to publish the clinical pictures in Figure 1. All individuals were evaluated at one of the collaborating referral centers and clinical data were recorded with a clinical checklist (Table S1). Skin biopsies were obtained from several probands for dermal fibroblast culture (F1:IV-2 and F4:II-1) and transmission electron microscopy (TEM) (F1:IV-2). This study was conducted in accordance with the Declaration of Helsinki and approved by the Ghent University Hospital ethical committees (registration number B6702020000194). Family 2, family 3, and family 4 were identified through GeneMatcher.<sup>33</sup>

### Exome sequencing

Exome sequencing (ES) was performed on genomic DNA (gDNA) extracted from blood leukocytes of each person. gDNA was enriched with the SureselectXT Human All Exon v.6 kit (Agilent Technologies, Santa Clara, CA, USA) followed by sequencing on a HiSeq 3000 platform (family 1) (Illumina, San Diego, CA, USA). *LTBP1* (GenBank: NM\_206943.4) nucleotides were numbered according to the Human Genome Variation Society guidelines with nucleotide “A” of the ATG start codon of the long isoform of *LTBP1* = c.1. The following algorithms were used to predict the consequences of variants identified with ES: PolyPhen-2, PhD-SNP, SIFT, SNAP, MAPP, and REVEL. Allele frequencies were evaluated via the gnomAD population database. Homozygosity mapping was performed prior to ES in family 2 via an Affymetrix Genome-Wide Human SNP Array 6.0 (Thermo Fisher, Waltham, MA, USA). Segregation analysis was performed in parents of affected individuals via Sanger sequencing. ES (family 3 and family 4) was done as previously described.<sup>34,35</sup>

### Transmission electron microscopy

For human dermal biopsies, 3 mm skin fragments from an individual (F1:IV-2) and an age- and sex-matched control were initially immersed in a fixative solution of 4% glutaraldehyde for transport. Subsequently, samples were placed in 2.5% glutaraldehyde and 4% formaldehyde in 0.1 M Na-Cacodylate buffer in a vacuum oven for 30 min followed by further fixation for 3 h at room temperature on a sample rotator. This solution was then replaced with fresh fixative and samples were incubated overnight at 4°C on a sample rotator. After washing in double-distilled H<sub>2</sub>O, samples were post-fixed in 1% OsO<sub>4</sub> with K<sub>3</sub>Fe(CN)<sub>6</sub> in 0.1 M Na-Cacodylate buffer (pH 7.2). After washing in double-distilled H<sub>2</sub>O, samples were subsequently dehydrated through a graded ethanol series, including bulk staining with 2% uranyl acetate at the 50% ethanol step followed by embedding in Spurr's resin. To select the area of interest on the block and in order to have an overview of the phenotype, we first cut semi-thin sections at 0.5  $\mu$ m and stained them with toluidine blue. Ultrathin sections were cut with an ultramicrotome (Leica EM UC6, Wetzlar, Germany) followed by post-staining in a Leica EM AC20 for 40 min in uranyl

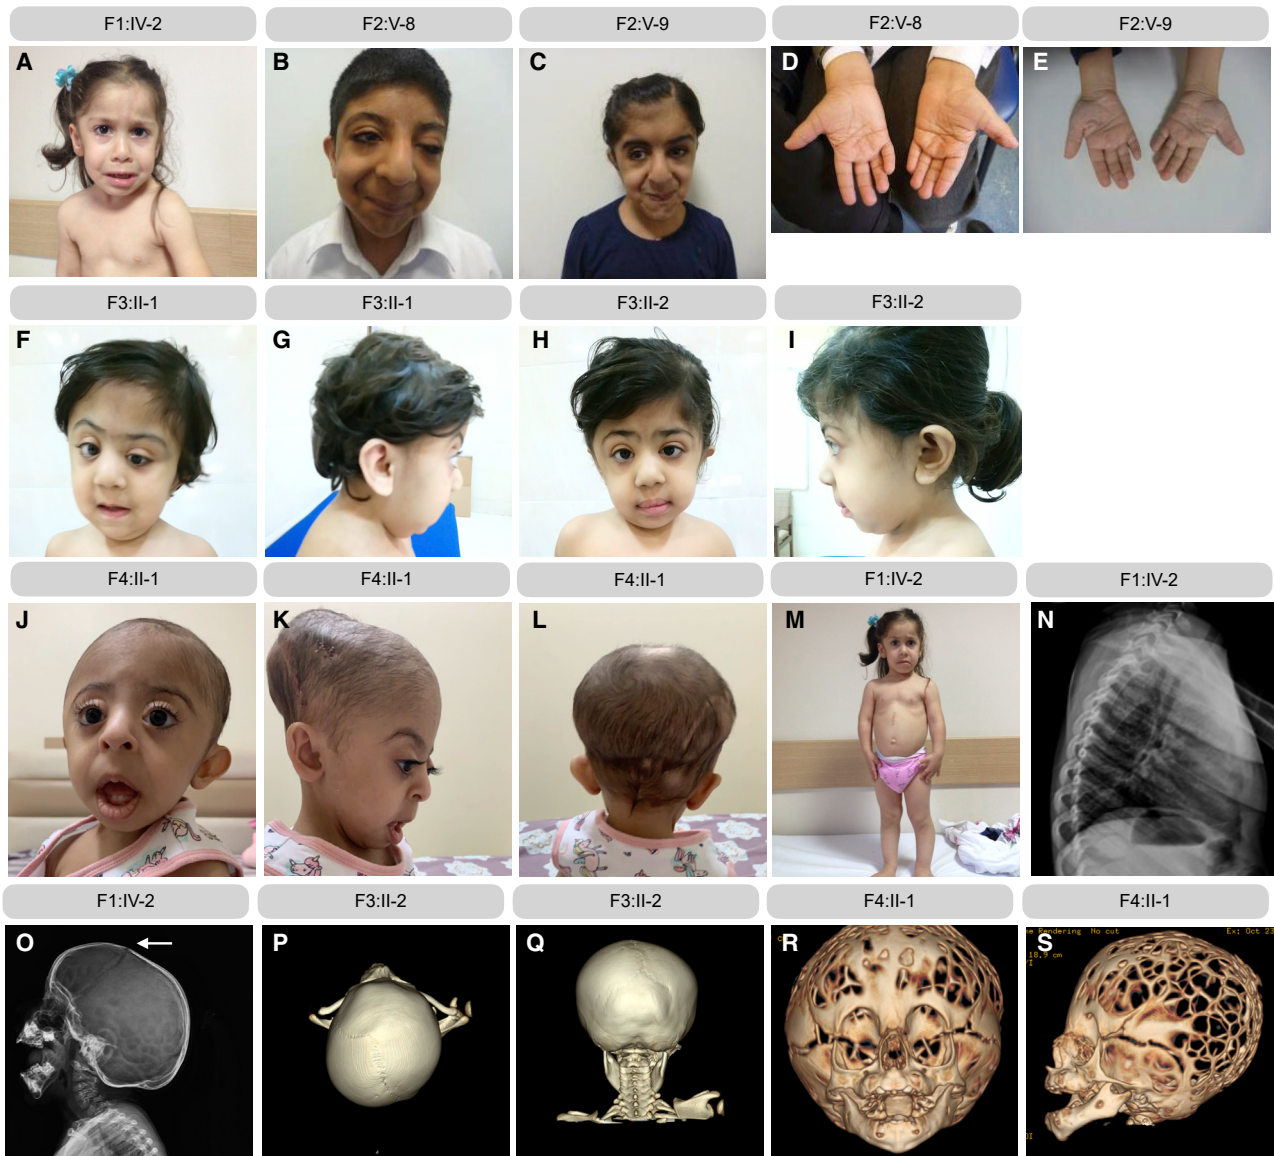

### Figure 1. Clinical characteristics

Clinical pictures of F1:IV-2 (at age 3 years) (A), F2:V-8 (at age 17 years) (B), F2:V-9 (at age 9 years) (C), F3:II-1 (at age 1.6 years) (F and G), F3:II-2 (at age 4 years) (H and I), and F4:II-1 (at age 2 years) (J–L). Brachydactyly is observed in multiple families, but clinical pictures (D and E) are only available from family 2. Short stature and ovoid-shaped vertebral bodies are observed in F1:IV-2 (at age 3 years) (M and N). A copper beaten calvarium and a coronal suture (arrow) are present in F1:IV-2 (at age 3 years) (O). Craniosynostosis involving the right coronal and sagittal suture is observed in F3:II-2 (at age 6 months) (P and Q). A copper beaten calvarium due to high intracranial pressure is present in F4:II-1 (R and S). Pedigrees of all affected families can be found in [Figure S1](#).

acetate at 20°C and for 10 min in lead stain at 20°C. Sections were collected on formvar-coated copper slot grids. Grids were viewed with a JEM 1400plus transmission electron microscope (JEOL, Tokyo, Japan) operating at 80 kV. For zebrafish, skin biopsies and vertebrae of 4- to 6-month-old male zebrafish were fixed and processed for ultrastructural analysis as previously described.<sup>36</sup> Sections were viewed with Jeol JEM 1010 TEM (Jeol, Tokyo, Japan) equipped with a charge-coupled device (CCD) side-mounted Velta camera operating at 60 kV. Experiments were performed in collaboration with the TEM facility of the Nematology Research Unit at Ghent University. Results are representative of three independent experiments.

### Cell culture

Dermal fibroblasts obtained from a skin biopsy from individuals F1:IV-2 and F4:II-1 and four healthy individuals (two control subjects, age- and sex-matched, for each individual, see [Table S2](#)) were cultured in Dulbecco's modified Eagle's medium (GIBCO; Thermo Fisher Scientific, Waltham, MA, USA) supplemented with 10% fetal bovine serum (PAN-Biotech, Aidenbach, Germany), 1% non-essential amino acids (GIBCO), 1% penicillin/streptomycin (GIBCO), and 0.1% fungizone (GIBCO) and incubated at 37°C with 5% CO<sub>2</sub>. Cells were tested for mycoplasma contamination by biochemical analysis of mycoplasma enzymes (Lonza, Basel, Switzerland) and confirmed to be mycoplasma free.



## Antibodies

The following primary antibodies and dilutions were used for immunoblot analysis: anti-Phospho-Smad2 (Ser465/467) (#3108, Cell Signaling Technologies [CST], Danvers, MA, USA, 1/500), anti-Smad2 (#5339, CST, 1/1,000), anti-Vinculin (#13901, CST, 1/1,000), and anti-fibronectin (ab23750, Abcam, Cambridge, UK, 1/1,500). Anti-rabbit IgG HRP-linked Antibody (#7074 CST, 1/2,500–1/4,000) was used as secondary antibody. Polyclonal rabbit anti-FBN1 antiserum (1/1,000 for immunofluorescence [IF] and 1/2,000 for western blot [WB]) was raised against the recombinantly produced N-terminal half of human fibrillin-1 (F90).<sup>37,38</sup> Polyclonal rabbit anti-LTBP-1 antiserum (1/1,000 for IF) was raised against the last 214 C-terminal residues of human LTBP-1 L1K.<sup>3,38</sup> Polyclonal rabbit anti-Fbn2 antibody was raised against the C-terminally double-strep-tagged N-terminal recombinant human FBN2 polypeptide rF86 (Gln29-Asp<sup>535</sup>).<sup>39</sup> Polyclonal rabbit anti-LTBP-2 antiserum (1/1,000 for IF) was raised against the last 254 C-terminal residues of human LTBP-2 (Asp<sup>1568</sup>-Glu<sup>1821</sup>), similar to as described for L1K.<sup>38</sup> Anti-collagen I antibody (#ab34710, Abcam, 1/1,000) and polyclonal goat anti-collagen III (#1330-01, Southern Biotech, 1/1,000) were used for IF. Polyclonal rabbit antibody recognizing human fibulin-4 (1/1,000 for IF) was a kind gift from Dr. Takako Sasaki (Oita University). Goat anti-Rabbit IgG Alexa Fluor 555 (A32732, Life Technologies, 1/800) was used as secondary antibody.

## Recombinantly produced proteins

For recombinant protein production of LTBP1, cDNA encoding the wild-type (WT) human LTBP1 fragment of 541 C-terminal amino acid residues and corresponding fragments carrying c.4431T>A and c.4844del variants were overexpressed in HEK293 cells together with the unaffected control sequence. Encoding cDNAs were cloned into a variant of the pCEP-Pu vector, and stably transfected overexpressing cells were established after puromycin selection as previously described.<sup>9</sup> Proteins were expressed with a C-terminally placed double-strep-tag and purified via affinity chromatography from collected serum-free culture medium. Fresh medium was filtered with a suitable membrane filter and then subjected to Strep-Tactin XT gravity flow column (2 mL beads; IBA GmbH, Germany) at 4°C overnight. LTBP1 proteins were eluted with elution buffer (100 mM Tris/HCl [pH 8.0] 150 mM NaCl, 1 mM EDTA, 2.5 mM desthiobiotin). The collected fractions were concentrated and exchanged to PBS by Amicon Ultra Centrifugal Filter, 3 kDa (Merck Millipore, MA, USA). Using the same protocol, we recombinantly produced the N-terminal region of human fibrillin-1 (after signal peptide cleavage site, up to the amino acids coding for the fourth epidermal growth factor [EGF4] domain, encompassing the binding site for LTBP1). Production and purification of the N-terminal region of human FBN2 (rF86) was as previously described.<sup>40</sup>

## RT-qPCR

Total RNA was extracted from dermal fibroblast cultures from control subjects and individuals (F1:IV-2 and F4:II-1) via the RNeasy Kit (QIAGEN, Hilden, Germany) with DNase digestion of genomic DNA followed by cDNA synthesis with the iScript cDNA Synthesis Kit (Bio-Rad Laboratories, Hercules, CA, USA). Gene expression of *EFEMP2*, *FBLN5*, *LTBP3*, *LTBP4*, *FBN1*, *FBN2*, *FN*, *POSTN*, and *CTGF* was investigated between control subjects' and affected individuals' (F1:IV-2 and F4:II-1) dermal fibroblast cultures. Gene expression of *COL1A1*, *COL1A2*, and *COL3A1* was investigated between control subjects' and affected individuals' (F1:IV-2 and F4:II-1)

dermal fibroblast cultures stimulated with 25 µg/mL ascorbate (Sigma-Aldrich, St. Louis, MO, USA) for 3 days. All measurements were obtained from three separate dermal fibroblast culture samples originating from individuals F1:IV-2 and F4:II-1 and from two control subjects. Average values of the two control subjects were plotted as "control" for each experiment. Total RNA was extracted from juvenile zebrafish in quintuplicate in which 10 zebrafish larvae were pooled per sample. Gene expression of *ltbp1* was investigated between *ltbp1*<sup>-/-</sup> Δ29, *ltbp1*<sup>-/-</sup> Δ35, and WT zebrafish controls. Assays were prepared with the addition of SsoAdvanced SYBR Green supermix (Bio-Rad Laboratories) and were subsequently run on a LightCycler 480 Instrument II (Roche, Basel, Switzerland). Primers were designed via Primer-BLAST (Table S3). We used Biogazelle qBase+3.0 software for data analysis by using *YWHAZ*, *HPRT1*, and *RPL13A* for normalization of human dermal fibroblasts and *loopern*, *hatn10*, and *tdr7* for normalization of zebrafish samples.<sup>41</sup>

## Nonsense-mediated decay analysis

Dermal fibroblasts from individuals (F1:IV-2 and F4:II-1) and control subjects were incubated with 5 mg/mL cycloheximide for 17 h or vehicle followed by reverse transcription quantitative PCR (RT-qPCR). All measurements were obtained from three separate dermal fibroblast culture samples originating from individuals F1:IV-2 and F4:II-1 and from two control subjects. Average values of the two control subjects were plotted as "control" for each experiment.

## Immunoblot analysis and determination of TGFβ levels

For the investigation of extracellular proteins, conditioned serum-free medium of dermal fibroblast cultures from control subjects and affected individuals (F1:IV-2 and F4:II-1) was collected at day 14 as previously described.<sup>42</sup> Protein samples were subjected to 3%–8% Tris-acetate sodium dodecyl sulfate polyacrylamide gel electrophoresis (SDS-PAGE) before blotting, either by wet or dry blotting onto a polyvinylidene difluoride (PVDF) or nitrocellulose (NC) membrane. We used imperial protein staining (Life Technologies, Carlsbad, CA, USA) to visualize the total protein amount. For the investigation of intracellular proteins, cell lysate of confluent dermal fibroblast cultures from control subjects and affected individuals (F1:IV-2 and F4:II-1) was collected. Protein samples were subjected to 4%–12% Bis-Tris SDS-PAGE before dry blotting onto a PVDF membrane. Imaging was performed on an Amersham Imager 680 (GE Healthcare Life Sciences, Chicago, IL, USA). Resulting images were processed with Fiji software.<sup>43</sup> We measured total TGFβ protein levels in conditioned serum-free medium of dermal fibroblast cultures from control subjects and affected individuals (F1:IV-2 and F4:II-1) collected at day 9 by using the Quantikine ELISA (#MB100B, R&D Systems, Minneapolis, MN, USA) according to manufacturer's instructions. All measurements were obtained from three separate dermal fibroblast culture samples originating from individuals F1:IV-2 and F4:II-1 and from two control subjects. Average values of the two control subjects were plotted as "control" for each experiment. Recombinant human TGF-beta 1 (Bio-Techne Corporation, Minneapolis, MN, USA) was added at 2.5 ng/mL to one confluent control dermal fibroblast culture acting as positive control for Smad2 phosphorylation.

## Immunofluorescence

For analysis of ECM network formation, cells were seeded on uncoated glass coverslips at a density of  $8 \times 10^4$  cells/well in a 24-well plate. After culture, cells were washed with PBS, fixed at

–20°C in methanol/acetone, blocked in a phosphate-buffered saline/1% bovine serum albumin solution, and subsequently incubated with primary and secondary antibodies diluted in the blocking solution. Images were obtained from three independent experiments.

### Solid-phase binding assay

Multiwell plates were coated with purified LTBP1 (100 nM) in 50 mM carbonate/bicarbonate buffer (pH 9.6) at 4 °C overnight. Coated wells were blocked with 5% nonfat dry milk in TBS at room temperature for 1 h. Recombinant fibrillin-1 and -2 were serially diluted 1:2 in 2% milk, TBS, and incubated in the wells for 2 h followed by a 1 h incubation with anti-fibrillin-1 or -2 antibody (1/5,000). Color reaction of the enzyme immunoassay was achieved with the TMB (3,3',5,5'-tetramethyl-benzidine) Substrate Kit (Thermo Fisher Scientific, Waltham, MA, USA) and stopped with 0.1 M HCl after streptavidin-HRP (biotinylated) antibody incubation. Absorbance was read at 450 nm with a Microplate Reader Sunrise (Tecan, Maennedorf, Switzerland). We achieved curve fits to obtain affinity constants by employing Graphpad Prism 9 (La Jolla, CA, USA) and selecting the nonlinear one-site model.

### Surface plasmon resonance

We performed surface plasmon resonance (SPR) experiments as described previously<sup>44</sup> by using a Biacore 2000 system (Biacore AB, Uppsala, Sweden). We covalently coupled recombinant human fibrillin-1 covering the N-terminal region including EGF4 to CM5 sensor chips at 3,600 resonance units (RUs) by using the amine coupling kit following the manufacturer's instructions (Cytiva, Uppsala, Sweden), and 0–320 nM of recombinant LTBP1 was flown over in HBS-P buffer (0.01 M HEPES [pH 7.4], 0.15 M NaCl, 10 mM CaCl<sub>2</sub>, and 0.005% [v/v] surfactant P20). Affinity constants ( $K_D$ s) were calculated with nonlinear fitting (1:1 interaction model with mass transfer) to the association and dissociation curves according to the manufacturer's instructions (BIAevaluation v.3.0 software). Apparent equilibrium dissociation constants ( $K_D$  values) were then calculated as the ratio of  $k_d/k_a$ .

### Zebrafish lines and maintenance

Zebrafish lines were housed in a Zebtec semi-closed recirculation housing system at a constant temperature (27°C–28°C), pH (~7.5), conductivity (~550 µS), and light/dark cycle (14/10). Fish were fed twice a day with dry food (Gemma Micro, Skretting) and once with artemia (Ocean Nutrition, Essen, Belgium). *Ltbp1*<sup>-/-</sup> Δ29 and *Ltbp1*<sup>-/-</sup> Δ35 zebrafish were generated via CRISPR-Cas9 mutagenesis according to the workflow previously described.<sup>45</sup> Zebrafish were genotyped with primers listed in Table S4. We adhered to the general guidelines, in agreement with EU Directive 2010/63/EU for laboratory animals, for zebrafish handling, mating, embryo collection, and maintenance.<sup>46,47</sup> Approval for this study was provided by the local committee on the Ethics of Animal Experiments (Ghent University Hospital, Ghent, Belgium; permit number: ECD 17/63K and ECD 18/05).

### Echocardiography

We performed ultrasound imaging on 10- to 11-month-old male zebrafish by using a dedicated ultrasound apparatus Vevo 2100 (Visualsonics, Toronto, Canada) equipped with a high-frequency linear array transducer (MS 700, frequency 30–70 MHz). Zebrafish were placed in an anesthetic chamber containing 200 mg/L tricaine

(Sigma-Aldrich). Zebrafish were transferred to a 3D printed imaging chamber where the zebrafish was positioned ventral side up containing 100 mg/L tricaine to minimize movements. Water temperature was maintained at 28°C throughout the whole procedure. Image acquisition was conducted within 5 min after the induction of anesthesia. Echocardiographic images were obtained in two planes: long axis (LAX), enabling normalized 2D ventricular dimension parameters using the body surface area (BSA) normalization factor, and abdominal-cranial axis (ACX), for color Doppler and pulse-wave Doppler image acquisition, enabling cardiac function measurements.<sup>48,49</sup> Measurements and functional calculations were performed in Vevo LAB 1.7.0. Volumes of systole and diastole are calculated in Vevo LAB 1.7.0. on the basis of the geometry of mammalian heart. Therefore, we reported the area of the systole and diastole normalized to the body surface area.<sup>50</sup> Measurements were performed by a researcher blinded to the genotype.

### Whole-mount staining with alizarin red S

Alizarin red staining for mineralized bone of 4-month-old adult zebrafish was performed as previously described.<sup>51</sup> Stained specimens were analyzed for the presence of ectopic bone with a Leica M165 FC Fluorescent Stereo Microscope (Leica Microsystems, GmbH, Wetzlar, Germany). Ectopic bone counts started from the second caudal vertebral body (VB) (with complete neural and haemal arches and complete neural and haemal spines) (VB16–VB27). The vertebral columns were scored by two observers blinded to the genotype of the samples.

### µCT analysis

For µCT-based phenotyping and quantification, 4-month-old adult zebrafish were euthanized via an overdose of tricaine, fixed in 4% PFA for 48 h, and transferred to a 70% ethanol solution for scanning. Whole-body µCT scans of *ltbp1*<sup>-/-</sup> Δ29 (n = 5) and *ltbp1*<sup>-/-</sup> Δ35 (n = 5) zebrafish and corresponding controls (n = 4–5) were acquired on a SkyScan 1275 (Bruker, Kontich, Belgium) with the following scan parameters: 0.25 mm aluminum filter, 50 kV, 160 µA, 65 ms integration time, 0.5° rotation step, 721 projections/360°, and 21 µm voxel size. We generated DICOM files of individual zebrafish, which we segmented in MATLAB with custom FishCuT software, by using NRecon v.1.7.3.2 (Bruker) software followed by data analysis in the R statistical environment as previously described.<sup>52,53</sup>

### Statistical analysis

Statistical calculations, including multiple testing corrections, were performed with GraphPad Prism 9. p values < 0.05 were considered significant.

## Results

### Bi-allelic premature truncating variants in *LTBP1* cause cutis laxa with impaired craniofacial, skeletal, and cardiac development

Table 1, Figure 1, and Table S1 summarize and illustrate the clinical findings in all eight affected individuals. Detailed case reports and pedigrees are available in the supplemental notes. Core clinical features include cutis laxa, craniosynostosis, a copper beaten calvarium, short stature, and discernible craniofacial characteristics. Affected individuals show facial asymmetry, coarse facial features,

**Table 1. Overview of homozygous genotypes and clinical characteristics**

|                                   | <b>Proband 1,<br/>family<br/>F1:IV-2</b> | <b>Proband 2,<br/>family<br/>F2:V-3</b> | <b>Proband 3,<br/>family<br/>F2:V-4</b> | <b>Proband 4,<br/>family<br/>F2:V-8</b> | <b>Proband 5,<br/>family<br/>F2:V-9</b> | <b>Proband 6,<br/>family<br/>F3:II-1</b> | <b>Proband 7,<br/>family<br/>F3:II-2</b> | <b>Proband 8,<br/>family<br/>F4:II-1</b> | <b>Number and %<br/>affected individuals</b> |
|-----------------------------------|------------------------------------------|-----------------------------------------|-----------------------------------------|-----------------------------------------|-----------------------------------------|------------------------------------------|------------------------------------------|------------------------------------------|----------------------------------------------|
| <b>Demographic features</b>       |                                          |                                         |                                         |                                         |                                         |                                          |                                          |                                          |                                              |
| Age at last evaluation            | 3 years<br>4 months                      | 17 years<br>5 months                    | 16 years                                | 17 years                                | 9 years                                 | 1 year<br>6 months                       | 4 years                                  | 1 year 9 months                          | N/A                                          |
| Sex                               | female                                   | female                                  | female                                  | male                                    | female                                  | male                                     | female                                   | female                                   | N/A                                          |
| Parental consanguinity            | +                                        | +                                       | +                                       | +                                       | +                                       | +                                        | +                                        | +                                        | N/A                                          |
| Ethnicity                         | Turkish                                  | Pakistani                               | Pakistani                               | Pakistani                               | Pakistani                               | Pakistani                                | Pakistani                                | Saudi Arabic                             | N/A                                          |
| <b>Craniofacial dysmorphism</b>   |                                          |                                         |                                         |                                         |                                         |                                          |                                          |                                          |                                              |
| Coarse face                       | +                                        | +                                       | –                                       | +                                       | +                                       | +                                        | +                                        | +                                        | 7/8 (87.5%)                                  |
| Arched eyebrows                   | –                                        | +                                       | +                                       | +                                       | +                                       | +                                        | +                                        | –                                        | 6/8 (75%)                                    |
| Proptosis                         | –                                        | +                                       | –                                       | +                                       | +                                       | +                                        | +                                        | +                                        | 6/8 (75%)                                    |
| Downslanted palpebral fissures    | +                                        | +                                       | –                                       | +                                       | +                                       | –                                        | –                                        | +                                        | 5/8 (62.5%)                                  |
| Long eyelashes                    | +                                        | +                                       | +                                       | +                                       | +                                       | +                                        | +                                        | unknown                                  | 7/8 (87.5%)                                  |
| Convex nasal ridge                | –                                        | +                                       | +                                       | +                                       | +                                       | +                                        | +                                        | +                                        | 7/8 (87.5%)                                  |
| Wide nasal bridge and broad tip   | +                                        | +                                       | +                                       | +                                       | +                                       | +                                        | +                                        | +                                        | 8/8 (100%)                                   |
| Sagging cheeks                    | +                                        | +                                       | –                                       | +                                       | +                                       | +                                        | +                                        | +                                        | 7/8 (87.5%)                                  |
| Prominent nasolabial folds        | +                                        | +                                       | –                                       | +                                       | +                                       | +                                        | –                                        | +                                        | 6/8 (75%)                                    |
| Long philtrum                     | +                                        | +                                       | –                                       | +                                       | +                                       | +                                        | +                                        | +                                        | 7/8 (87.5%)                                  |
| Thick lower lip vermillion        | +                                        | +                                       | –                                       | +                                       | +                                       | +                                        | +                                        | +                                        | 7/8 (87.5%)                                  |
| Highly arched palate              | –                                        | –                                       | +                                       | +                                       | +                                       | +                                        | +                                        | –                                        | 5/8 (62.5%)                                  |
| <b>Connective tissue features</b> |                                          |                                         |                                         |                                         |                                         |                                          |                                          |                                          |                                              |
| Cutis laxa                        | +                                        | +                                       | +                                       | +                                       | +                                       | +                                        | +                                        | +                                        | 8/8 (100%)                                   |
| Deep palmar creases               | +                                        | +                                       | –                                       | +                                       | +                                       | +                                        | +                                        | +                                        | 7/8 (87.5%)                                  |
| Inguinal hernia                   | +                                        | +                                       | –                                       | +                                       | +                                       | +                                        | –                                        | –                                        | 5/8 (62.5%)                                  |

*(Continued on next page)*

**Table 1. Continued**

|                                  | <b>Proband 1,<br/>family<br/>F1:IV-2</b> | <b>Proband 2,<br/>family<br/>F2:V-3</b> | <b>Proband 3,<br/>family<br/>F2:V-4</b> | <b>Proband 4,<br/>family<br/>F2:V-8</b> | <b>Proband 5,<br/>family<br/>F2:V-9</b> | <b>Proband 6,<br/>family<br/>F3:II-1</b> | <b>Proband 7,<br/>family<br/>F3:II-2</b> | <b>Proband 8,<br/>family<br/>F4:II-1</b> | <b>Number and %<br/>affected individuals</b> |
|----------------------------------|------------------------------------------|-----------------------------------------|-----------------------------------------|-----------------------------------------|-----------------------------------------|------------------------------------------|------------------------------------------|------------------------------------------|----------------------------------------------|
| <b>Skeletal features</b>         |                                          |                                         |                                         |                                         |                                         |                                          |                                          |                                          |                                              |
| Craniosynostosis                 | –                                        | +                                       | –                                       | +                                       | +                                       | +                                        | +                                        | +                                        | 6/8 (75%)                                    |
| Short stature                    | +                                        | +                                       | +                                       | +                                       | +                                       | +                                        | +                                        | +                                        | 8/8 (100%)                                   |
| Brachydactyly                    | +                                        | +                                       | +                                       | +                                       | +                                       | +                                        | +                                        | –                                        | 7/8 (87.5%)                                  |
| Clinodactyly                     | +                                        | +                                       | –                                       | +                                       | +                                       | +                                        | +                                        | +                                        | 7/8 (87.5%)                                  |
| Syndactyly                       | –                                        | +                                       | –                                       | +                                       | +                                       | +                                        | +                                        | –                                        | 5/8 (62.5%)                                  |
| Joint hyperlaxity                | +                                        | –                                       | –                                       | –                                       | –                                       | +                                        | +                                        | +                                        | 4/8 (50%)                                    |
| Genua vara                       | +                                        | –                                       | –                                       | –                                       | –                                       | +                                        | –                                        | +                                        | 3/8 (37.5%)                                  |
| <b>Additional features</b>       |                                          |                                         |                                         |                                         |                                         |                                          |                                          |                                          |                                              |
| Learning difficulties            | –                                        | +                                       | +                                       | –                                       | +                                       | –                                        | –                                        | unknown                                  | 3/8 (37.5%)                                  |
| Cardiac abnormalities            | +                                        | +                                       | –                                       | –                                       | –                                       | +                                        | –                                        | –                                        | 3/8 (37.5%)                                  |
| Hearing loss                     | –                                        | +                                       | –                                       | +                                       | +                                       | –                                        | –                                        | –                                        | 3/8 (37.5%)                                  |
| Feeding problems/GER             | –                                        | –                                       | –                                       | –                                       | –                                       | +                                        | +                                        | +                                        | 3/8 (37.5%)                                  |
| Urological abnormalities         | +                                        | –                                       | –                                       | –                                       | +                                       | –                                        | –                                        | –                                        | 2/8 (25%)                                    |
| <b>Molecular characteristics</b> |                                          |                                         |                                         |                                         |                                         |                                          |                                          |                                          |                                              |
| Gene                             | <i>LTBP1</i>                             | <i>LTBP1</i>                            | <i>LTBP1</i>                            | <i>LTBP1</i>                            | <i>LTBP1</i>                            | <i>LTBP1</i>                             | <i>LTBP1</i>                             | <i>LTBP1</i>                             | N/A                                          |
| cDNA change                      | c.4844del                                | c.4431T>A                               | c.4431T>A                               | c.4431T>A                               | c.4431T>A                               | c.3991_3995del                           | c.3991_3995del                           | c.1342C>T                                | N/A                                          |
| Protein change                   | p.Asn1615Ilefs*23                        | p.Cys1477*                              | p.Cys1477*                              | p.Cys1477*                              | p.Cys1477*                              | p.Thr1331Asnfs*20                        | p.Thr1331Asnfs*20                        | p.Gln448*                                | N/A                                          |

arched eyebrows, proptosis, downslanting palpebral fissures, long eyelashes, a prominent nose with convex nasal ridge, wide nasal bridge and broad nasal tip, sagging cheeks with prominent nasolabial folds, long philtrum, thick lower lip vermilion, and a highly arched palate. Skin features include mild to moderate cutis laxa, deep palmar creases, and inguinal hernia (F1:IV-2, F2:V-3, F2:V-8, F2:V-9, and F3:II-1). Individual F1:IV-2 further presents with a congenital diaphragmatic hernia, but this is also present in her carrier mother. All affected individuals, with the exception of F1:IV-2 and F2:V-4, present with craniosynostosis, involving the coronal suture (F2:V-3 and F2:V-9), coronal, sagittal, and lambdoid suture (F2:V-8), or right coronal and sagittal suture (F3:II-1 and F3:II-2). Individual F4:II-1 shows pansynostosis. In addition to short stature, most individuals show other skeletal abnormalities, including brachydactyly (F1:IV-2, F2:V-3, F2:V-4, F2:V-8, F2:V-9, F3:II-1, and F3:II-2), clinodactyly of the fifth finger (F1:IV-2, F2:V-3, F2:V-8, F2:V-9, F3:II-1, F3:II-2, and F4:II-1), syndactyly of the 2<sup>nd</sup>, 3<sup>rd</sup>, and 4<sup>th</sup> toe (F2:V-8 and F2:V-9), syndactyly of the 2<sup>nd</sup> and 3<sup>rd</sup> toe (F2:V-3), syndactyly of the 4<sup>th</sup> and 5<sup>th</sup> toe (F3:II-1 and F3:II-2), genua vara (F1:IV-2, F3:II-1, and F4:II-1), and joint hypermobility (F1:IV-2, F3:II-1, F3:II-2, and F4:II-1). Less frequent skeletal findings include scoliosis (F1:IV-2 and F3:II-2), lumbar hyperlordosis (F1:IV-2), hip dislocation (F2:V-3), and a short thorax with pectus excavatum (F4:II-1). X-ray images of the spine from F1:IV-2 showed “ovoid-”shaped vertebral bodies at the age of 3 years. No evidence for exostoses could be observed on the X-ray images, but no CT scan was made to exclude this with more certainty. Variable heart defects were found in three individuals. A moderate secundum atrial septum defect of congenital origin with mild right ventricular volume overload was observed in F3:II-1. F1:IV-2 shows mitral and tricuspid insufficiency, and mild concentric left ventricular hypertrophy is present in F2:V-3. Neurodevelopment was normal in most individuals, but F2:V-3 and F2:V-4 experience learning difficulties. Severe intellectual disability of unknown cause has been recorded in individual F2:V-4. Cranial nerve dysfunction occurred in families 2 and 3. In family 2, optic nerve hypoplasia and associated visual impairment is present in individuals F2:V-4, F2:V-8, and F2:V-9, while F2:V-3, F2:V-8, and F2:V-9 have hearing loss. Both affected individuals from family 3 display ophthalmoplegia due to a 3<sup>rd</sup> and 4<sup>th</sup> cranial nerve palsy. Feeding problems, attributable to gastroesophageal reflux or poor appetite, were recorded in F2:V-4, F3:II-1, F3:II-2, and F4:II-1. Finally, urological abnormalities, including a low and small right kidney in F1:IV-2 and left hydronephrosis in F2:V-8, are observed in two families.

Exome sequencing (ES) identified homozygous premature truncating variants in *LTBP1* (GenBank: NM\_206943.4) in eight affected children from four different families. Prior to ES, homozygosity mapping in family 2 showed one shared 22.9 Mb homozygous region on chromosome 2 (20,605,248–43,530,418), containing *LTBP1*, between the three affected individuals tested and absent in

unaffected family members. Families 1 and 3 harbor homozygous frameshift variants in *LTBP1* consisting of a 1 base pair (bp) (c.4844del [p.Asn1615Ilefs\*23]) and 5 bp deletion (c.3991\_3995del [p.Thr1331Asnfs\*20]), respectively. Families 2 and 4 harbor homozygous nonsense variants (c.4431T>A [p.Cys1477\*] and c.1342C>T [p.Gln448\*], respectively). All variants segregate in family members according to disease—and carrier status. According to different *in silico* algorithms, the identified variants are predicted to be disease causing and all variants are absent from the population databases. Schematic presentation of the corresponding alterations in *LTBP1* and their amino acid homology in other species are shown in Figure 2. TEM analysis of the dermis from a skin biopsy was done in individual F1:IV-2 (Figure 3). The elastic fiber shows microfibril infiltration in its periphery with mild fragmentation of elastin that still formed a central core (Figures 3C and 3D). Collagen fibrils appear similar to the control subject with regular fiber diameters (Figures 3E–3H).

#### ***LTBP1*-deficient ECM responses are variant specific**

We used dermal fibroblasts cultured from skin biopsies of F1:IV-2 and F4:II-1 in this study. Skin biopsies of F2:V-3, F2:V-4, F2:V-8, F2:V-9, F3:II-1, and F3:II-2 are not available. We characterized *LTBP1* transcript and protein levels in dermal fibroblasts derived from individuals F1:IV-2 and F4:II-1. Both variants (c.4844del and c.1342C>T, respectively) are predicted to be susceptible to nonsense-mediated decay (NMD).<sup>54</sup> RT-qPCR indicates that *LTBP1* mRNA expression is completely abolished in dermal fibroblast cultures of F4:II-1 (c.1342C>T) compared to control fibroblasts but is partly rescued upon cycloheximide treatment, indicative of NMD (Figure 4A). In contrast, *LTBP1* mRNA expression in dermal fibroblasts of F1:IV-2 (c.4844del) is present at equal levels as in fibroblasts of control subjects (Figure 4B). In line with the mRNA expression data, immunofluorescent analysis at 9 days post confluency (dpc) shows complete absence of *LTBP1* in dermal fibroblasts of F4:II-1 (Figure 4B) but rudimentary *LTBP1* fibers in dermal fibroblasts of F1:IV-2 (Figure 4D). The C terminus of *LTBP1* interacts with the N terminus of fibrillin-1 and fibrillin-2 (Figure 2). To evaluate the interaction of truncated *LTBP1* with fibrillin-1, we used recombinantly expressed C-terminal *LTBP1* fragments containing the c.4844del (p.Asn1615Ilefs\*23) and c.4431T>A (p.Cys1477\*) variants in solid-phase binding studies with the N-terminal region of fibrillin-1 and fibrillin-2. Binding studies using surface plasmon resonance (SPR) showed that both mutant *LTBP1* fragments show negligible binding to the immobilized N-terminal region of fibrillin-1 when compared to the control fragment ( $K_D = 12 \pm 2$ ) (Figures S2A–S2D). Solid-phase binding studies in the opposite direction (*LTBP1* immobilized; fibrillin-1 and -2 incubated in solution) also show a significant reduction of binding affinity of the N-terminal regions of fibrillin-1 (8- to 12-fold) and fibrillin-2 (16- to 40-fold) to either mutant *LTBP1* fragment (Figures 4E, 4F, and S2E). Taken together, these results suggest that *LTBP1*



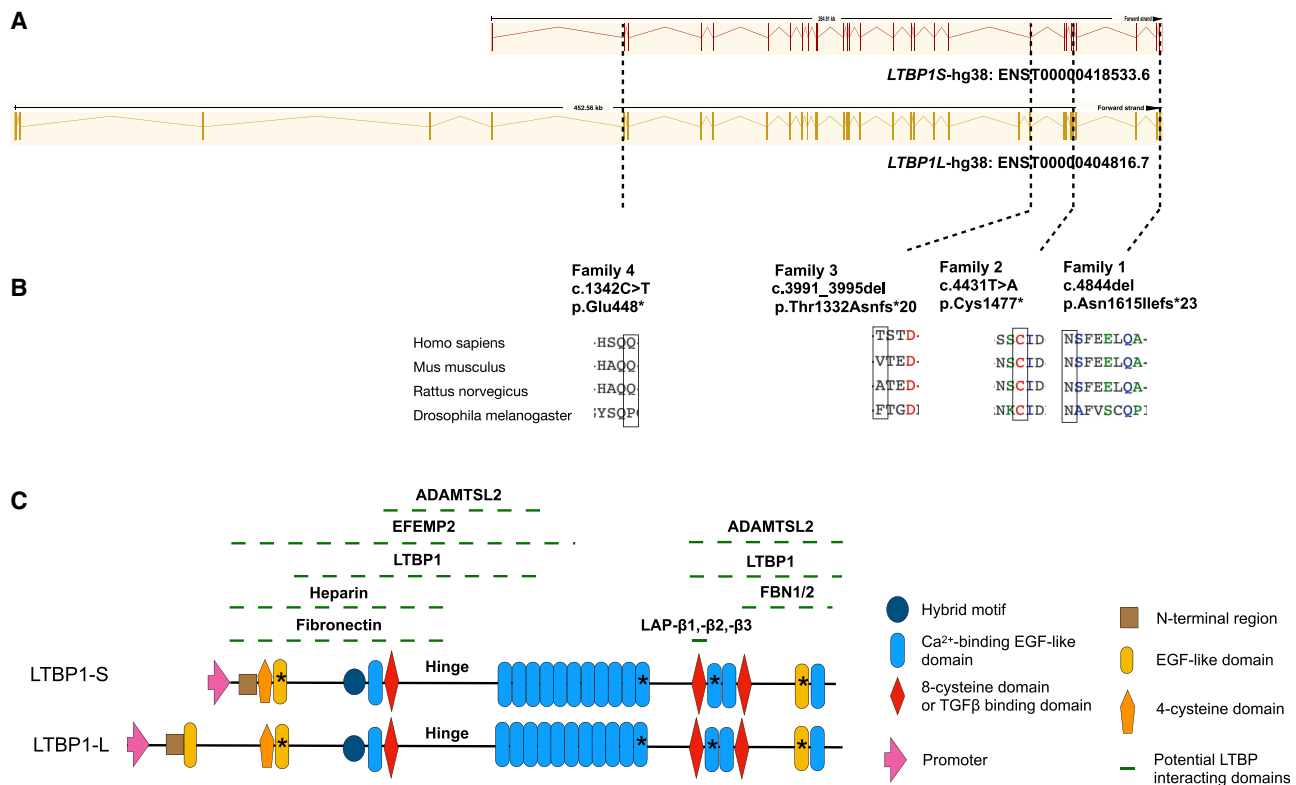

**Figure 2. Schematic representation of the premature truncating variants in *LTBP1* and corresponding protein in four unrelated consanguineous families**

(A) Schematic representation of the location of the four distinct *LTBP1* variants identified in the affected families. The genomic position of each variant is indicated on the exon structure of both the short (*LTBP1S*) and long (*LTBP1L*) isoforms of *LTBP1*.

(B) Sequence alignment shows conservation of the mutated residues among different species.

(C) Schematic representation of the *LTBP1* domains. *LTBP1* consists of fifteen calcium-binding (cb) EGF-like domains, three EGF-like domains, two TGFβ-binding domains, a hybrid motif, and a 4-cysteine domain. The position of the corresponding alterations on the protein level are indicated by an asterisk.

is loosely anchored to the fibrillin microfibril network assembled by dermal fibroblasts derived from F1:IV-2.

We next analyzed the mRNA expression and protein levels of fibronectin and fibrillin-1, the most important binding partners of *LTBP1*. *FN* mRNA (Figures S3A and S3D) and fibronectin protein level in the conditioned media (Figures S3G–S3J) and in the ECM fraction (Figures S3K and S3L) are unaltered in cultured dermal fibroblasts from both affected individuals (F1:IV-2 [c.4844del] and F4:II-1 [c.1342C>T]) compared to control fibroblasts. In cultured dermal fibroblasts of F1:IV-2, *FBN1* mRNA expression (Figure S3B) and fibrillin-1 protein level in the conditioned media is equal to control fibroblasts (Figures S3M and S3N), but fibrillin-1 immunofluorescent analysis shows increased fibrillin-1 deposition in the ECM fraction (Figure S3Q). Of note, *FBN2* mRNA expression was significantly increased in cultured dermal fibroblasts of F1:IV-2 (Figure S3C). In contrast, cultured dermal fibroblasts of F4:II-1 show significantly reduced *FBN1* mRNA but normal *FBN2* mRNA levels (Figures S3E and S3F) and, accordingly, significantly decreased fibrillin-1 protein present in the conditioned media compared to control fibroblasts (Figures S3O and S3P). Fibrillin-1 immunofluorescent

analysis of the ECM fraction in cultured dermal fibroblasts of F4:II-1 is comparable to control fibroblasts, although the fibers appear more patchy (Figure S3R).

In cultured dermal fibroblasts of F1:IV-2, *EFEMP2* (*FBLN4*) mRNA levels are normal, but *EFEMP2* fibers are completely abolished in the ECM fraction (Figures S4A and S4E), suggesting that the presence of the c.4844del variant interferes with *EFEMP2* ECM incorporation. In contrast, cultured dermal fibroblasts of F4:II-1 show normal abundance of *EFEMP2* fibers in the ECM fraction but significantly decreased *EFEMP2* mRNA levels (Figures S4B and S4I). We addressed gene expression and protein levels of other members of the *LTBP* protein family. Immunofluorescent analysis shows a remarkable increase in *LTBP2* fibers in cultured dermal fibroblasts of F1:IV-2 at 9 dpc, while no change is detected for F4:II-1 fibroblasts compared to control fibroblasts (Figures S4C and S4D). *LTBP3* expression was significantly increased in cultured dermal fibroblasts of F1:IV-2 (Figure S4G) but significantly decreased in cultured dermal fibroblasts of F4:II-1 (Figure S4K). *LTBP4* expression remained equal between cultured dermal fibroblasts of F4:II-1, cultured dermal fibroblasts of F1:IV-2, and control fibroblasts (Figures S4H

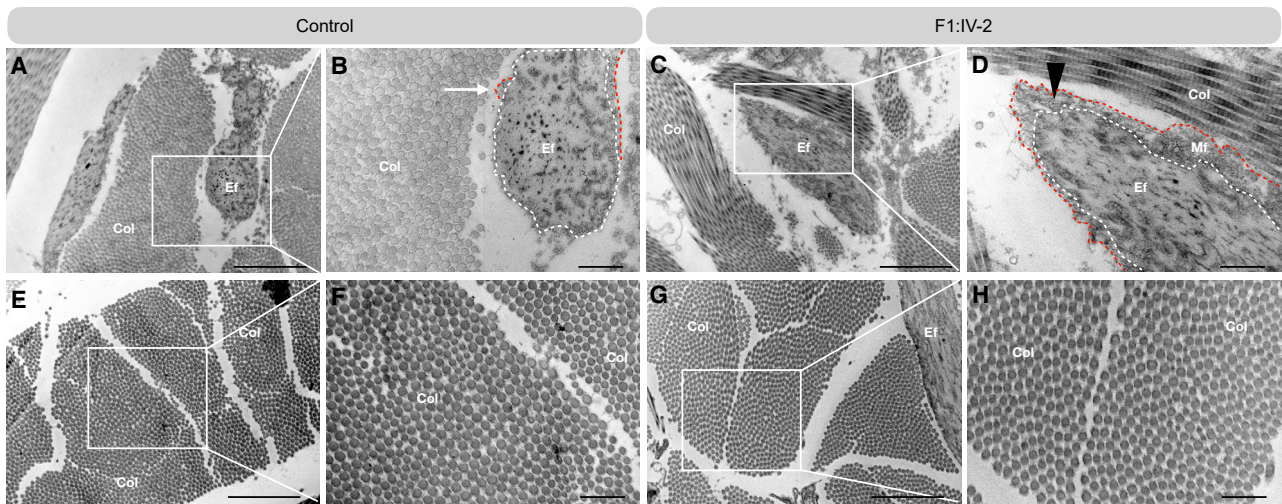

**Figure 3. Ultrastructural analysis of the ECM in dermal biopsies**

(A–D) Ultrastructural analysis of the elastic fibers in a skin biopsy of affected individual F1:IV-2 (C and D) and a control subject (A and B). (E–H) Ultrastructural analysis of collagen fibrils in a skin biopsy of affected individual F1:IV-2 (G and H) and a control subject (E and F). Scale bar represents 2  $\mu\text{m}$  (A, C, E, and G) and scale bar represents 500 nm (B, D, F, and H). The elastin core (dotted while line) is surrounded by a spare mantle of microfibrils in the control subject (red dotted line, white arrow). Note that microfibrils infiltrate into the periphery of the elastic fiber in a skin biopsy of affected individual F1:IV-2 (red dotted line, black triangle). Col, collagen; Ef, elastic fiber; Mf, microfibrils.

and S4L). Finally, *FBLN5* expression is unchanged in both affected individuals (Figures S4F and S4J). Together, these data indicate that complete loss (c.1342C>T) of LTBP1 and the presence of C-terminally aberrant LTBP1 (c.4844del) each have a different effect on ECM assembly.

#### TGF $\beta$ signaling response to *LTBP1* deficiency is variant specific

LTBP1 interacts with the SLC and plays an important role in regulating the bioavailability of TGF $\beta$  in the ECM. Therefore, we investigated the canonical TGF $\beta$  pathway in cultured fibroblasts derived from affected individuals and control subjects. Total TGF $\beta$  protein levels are significantly increased in conditioned media of F1:IV-2, but not of F4:II-1, compared to control subjects (Figures 5A and 5D). Also, expression levels of the canonical (SMAD2/3-dependent) TGF $\beta$ -target genes, *CTGF* and *POSTN*, are significantly upregulated in cultured dermal fibroblasts of F1:IV-2 at 1 dpc compared to control fibroblasts (Figures 5B and 5C), while expression of *POSTN* remains equal and *CTGF* expression is significantly decreased in cultured dermal fibroblasts of F4:II-1 at 1 dpc compared to control fibroblasts (Figures 5E and 5F). Accordingly, the pSmad2/Smad2 ratio is significantly increased in cultured dermal fibroblasts of F1:IV-2 at 1 dpc (Figures 5G, 5H, S5A, and S5B) but unaltered in cultured dermal fibroblasts of F4:II-1 compared to controls (Figures 5I and 5J). *COL1A1*, *COL1A2*, and *COL3A1* are significantly upregulated in cultured dermal fibroblasts of both F1:IV-2 and F4:II-1 at 1 dpc (Figures 5O–5T). Immunofluorescent analysis shows a marked increase in collagen I and collagen III fibers in cultured dermal fibroblasts of F1:IV-2 at 9 dpc (Figures 5K and 5M), while collagen

I and collagen III fibers are equal in F4:II-1 fibroblasts compared to control fibroblasts (Figures 4L and 4N). Together, these data indicate that complete loss (c.1342C>T [p.Gln448\*]) of LTBP1 and the presence of C-terminally aberrant LTBP1 (c.4844del [p.Asn1615Ilefs\* 23]) each impact TGF $\beta$  signaling differently.

#### *Ltbp1* deficiency causes ectopic bone and reduced tissue mineral density in the zebrafish skeleton but does not affect cardiac function

In order to further investigate the impact of *ltbp1* deficiency in an *in vivo* setting, we generated zebrafish models. *LTBP1* is well-conserved between humans and zebrafish, and zebrafish *Ltbp1* shows a (predicted) domain homology similar to human *LTBP1* (Figure S6). However, in contrast to humans, zebrafish only express a long form of the *ltbp1*, and no other isoforms are present in the genome. Using CRISPR-Cas9 technology, we generated two *ltbp1*<sup>-/-</sup> zebrafish models, one harboring a 1 bp deletion, c.3526del, in exon 29 and one harboring a 10 bp deletion, c.4294\_4303del, in exon 35 (Figure S7). Both deletions result in a premature stop codon and cause reduced *ltbp1* expression at the juvenile stage (Figure S8A). *Ltbp1*<sup>-/-</sup> $\Delta$ 29 zebrafish lack two TGF $\beta$ -binding domains, three calcium-binding EGF-like domains, and one EGF-like domain at the *Ltbp1* C terminus. *Ltbp1*<sup>-/-</sup> $\Delta$ 35 zebrafish lack the last calcium-binding EGF-like domains and the last EGF-like domain.

*Ltbp1*<sup>-/-</sup> $\Delta$ 29 and *ltbp1*<sup>-/-</sup> $\Delta$ 35 zebrafish have similar weight and length compared to WT siblings, show Mendelian inheritance, and do not show premature mortality (Figures S8B and S8C). Investigation of the skeletal

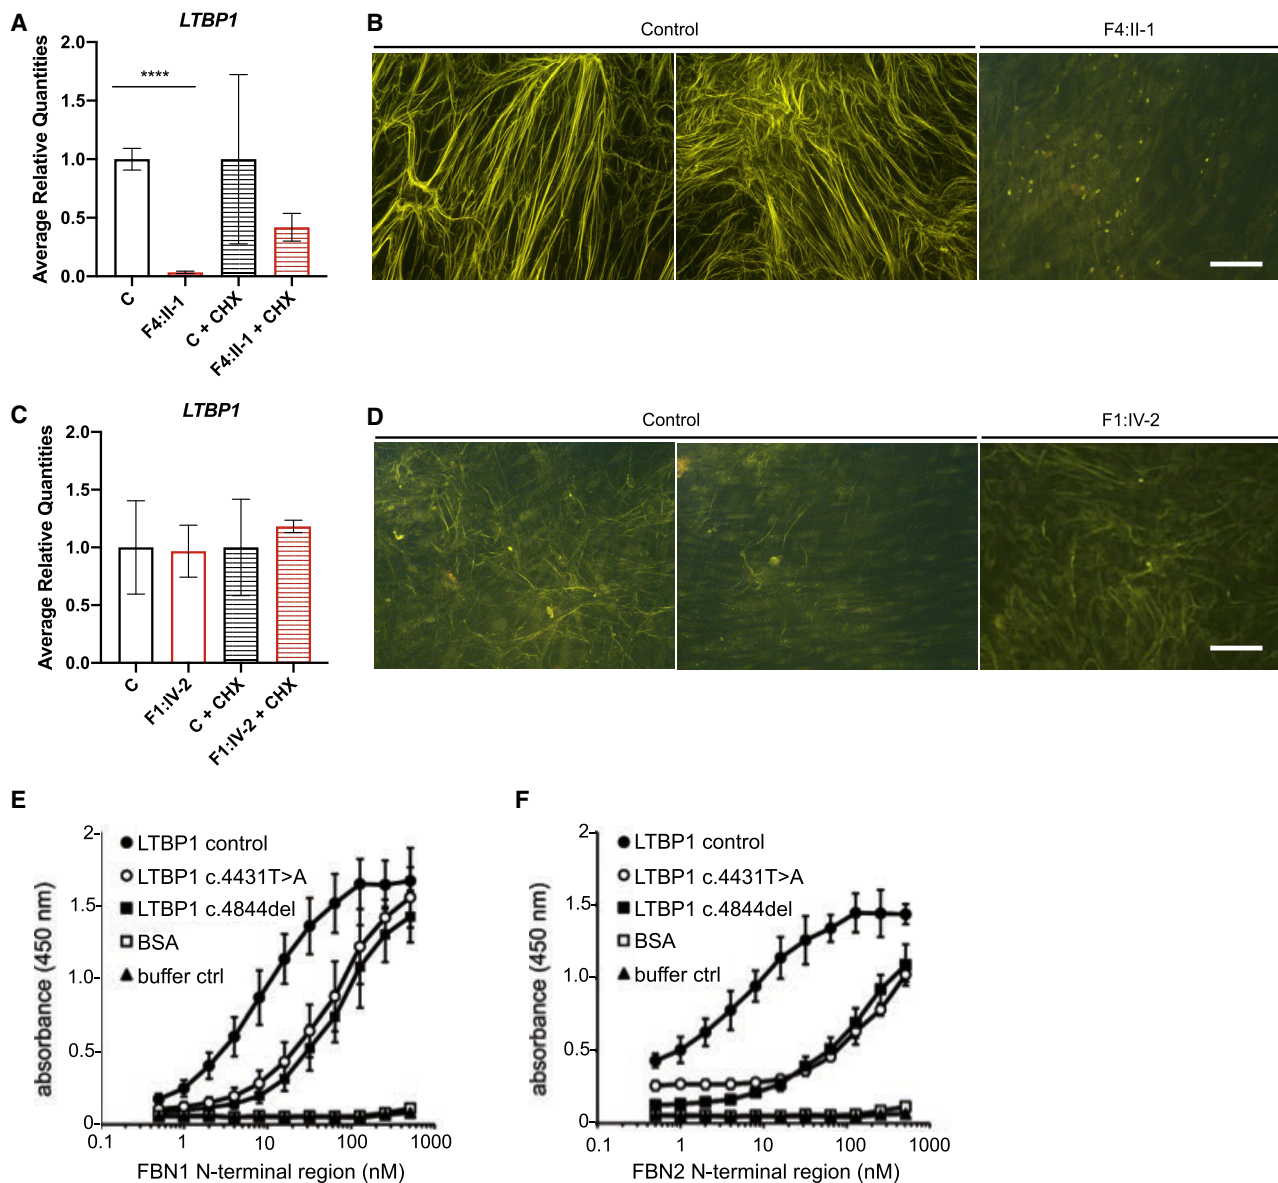

**Figure 4. Effect of the *LTBP1* variants on the assembly of *LTBP1* in the ECM**

(A and C) Quantification of *LTBP1* expression with and without CHX treatment by RT-qPCR.

(B and D) Representative images of immunofluorescent analysis of *LTBP1* in 9 dpc fibroblast cultures derived from affected individuals and control subjects. Scale bar represents 50  $\mu$ m.

(E and F) Solid-phase binding assay of soluble *LTBP1* fragments to immobilized N-terminal region of FBN1. The negative control was incubated with buffer only. Results are representative of three independently conducted experiments. Data are expressed as mean  $\pm$  standard deviation (SD). \*\*\*\**p* value < 0.0001. Two-tailed unpaired *t* test with Welch's correction was used for statistical analysis.

phenotype demonstrated that the neural and haemal arches of the vertebrae of *ltbp1*<sup>-/-</sup> $\Delta$ 29 and *ltbp1*<sup>-/-</sup> $\Delta$ 35 zebrafish have ectopic bone formation (of intramembranous origin) (Figures 6A–6J). In addition, the arch bases that sit on the vertebrae clearly show more intramembranous bone (white dotted lines in Figures 6C, 6D, 6G, and 6H). Quantitative  $\mu$ CT analysis of 4-month-old zebrafish reveals a significant decrease in tissue mineral density (TMD) of the vertebral centrum and a significant decrease in TMD of the neural- and haemal-associated elements of the skeleton in *ltbp1*<sup>-/-</sup> $\Delta$ 29 zebrafish compared to WT siblings (Figures

6K, 6M, 6N, and S9). The volume of these skeletal elements tends to be increased in *ltbp1*<sup>-/-</sup> $\Delta$ 29 zebrafish, although statistical significance is not reached. This finding is further supported by an increased volume of the vertebrae observed in alizarin red-stained *ltbp1*<sup>-/-</sup> $\Delta$ 29 zebrafish vertebral columns (Figures 6D and 6H). Bone thickness also tends to be increased (*p* value < 0.07) in *ltbp1*<sup>-/-</sup> $\Delta$ 29 zebrafish. Interestingly, quantitative  $\mu$ CT parameters were not different between *ltbp1*<sup>-/-</sup> $\Delta$ 35 zebrafish and WT siblings (Figures 6L, 6O, 6P, and S9). *Ltbp1*<sup>-/-</sup> $\Delta$ 29 and *ltbp1*<sup>-/-</sup> $\Delta$ 35 zebrafish have normal interfrontal, coronal, sagittal, and lambdoid



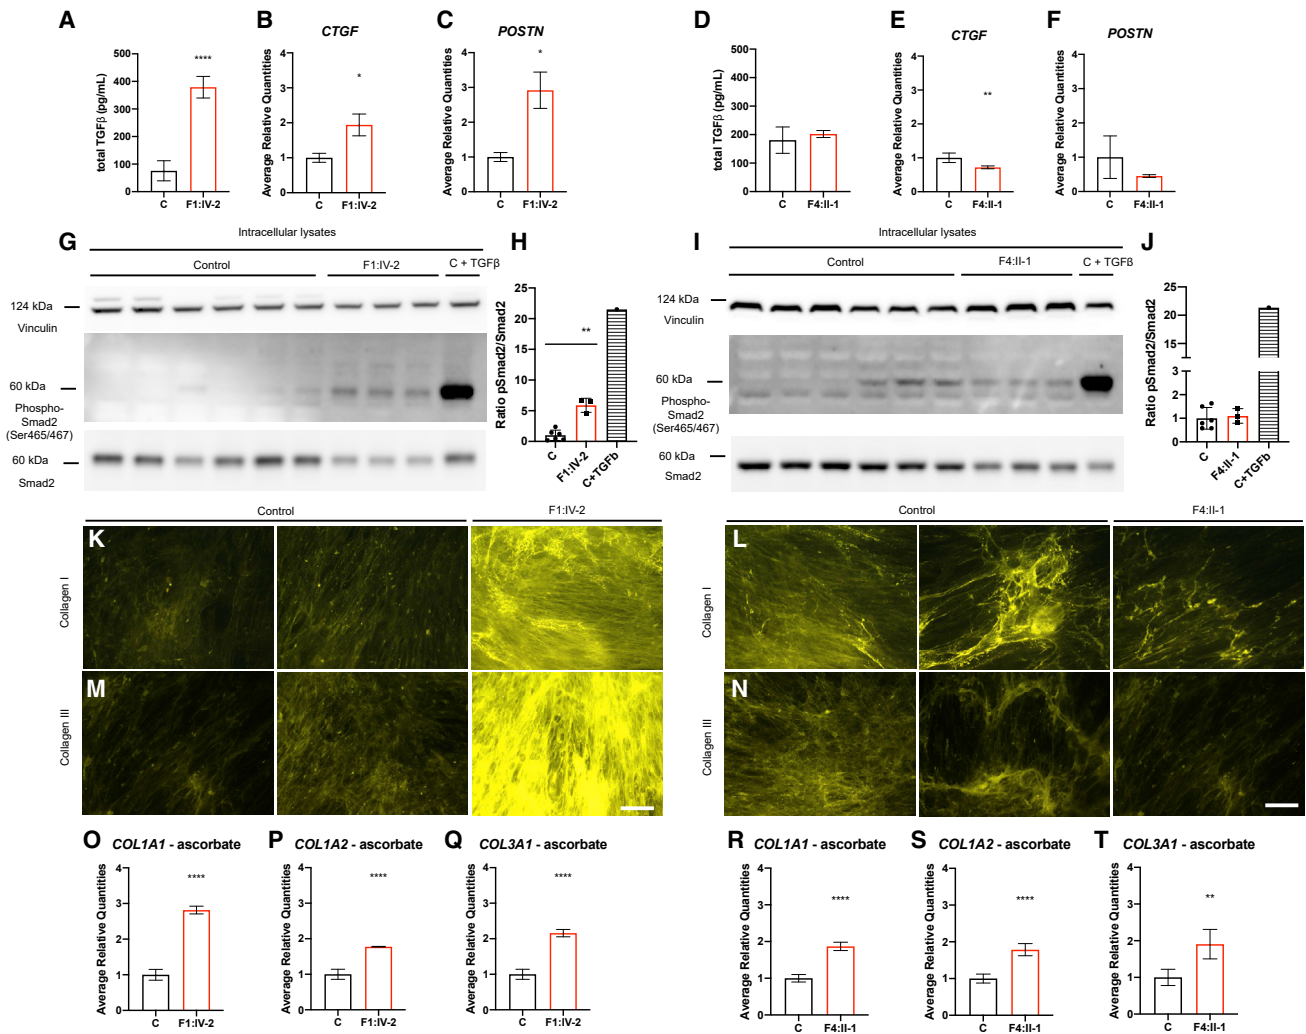

**Figure 5. *LTBP1* variant-specific canonical TGFβ signaling responses**

(A and D) Measurement of total TGFβ in 9 dpc conditioned media obtained from fibroblast cultures derived from individuals F1:IV-2 and F4:II-1 and respective sex- and age-matched control subjects. (B, C, E, and F) Quantification of *CTGF* and *POSTN* expression by RT-qPCR. (G–J) Immunoblot of intracellular lysates at 1 dpc obtained from fibroblast cultures derived from individuals F1:IV-2 and F4:II-1 and respective sex- and age-matched control subjects. One of the control subjects was stimulated with TGFβ as positive control. (K–N) Representative images demonstrating immunofluorescent analysis of collagen I and collagen III fibers in 9 dpc fibroblast cultures stimulated with ascorbate. Scale bar represents 50 μm. (O–T) Quantification of *COL1A1*, *COL1A2*, and *COL3A1* expression by RT-qPCR after ascorbate stimulation. Data are expressed as mean ± SD. \*p value < 0.05, \*\*p value < 0.01, \*\*\*\*p value < 0.0001. Two-tailed unpaired t test with Welch's correction was used for statistical analysis.

sutures (Figures S8D–S8K) and do not show alterations in cranial morphological structures, including the hyomandibula, premaxilla, and basioccipital bone (Figures S8D–S8K). Because the complete knockout of *Ltbp1* in mice causes a severe cardiovascular phenotype, we investigated the cardiac parameters. Assessment of cardiovascular function in adult zebrafish by ultrasound imaging, however, revealed no significant differences between *ltbp1*<sup>-/-</sup>Δ29 zebrafish, *ltbp1*<sup>-/-</sup>Δ35 zebrafish, and corresponding WT siblings at 10 months of age (Figure S10). Taken together, *ltbp1*<sup>-/-</sup>Δ29 zebrafish reveal vertebral hypo-mineralization, voluminous vertebrae, and ectopic bone formation but normal heart function.

### ***Ltbp1* deficiency causes abnormal collagen fibrillogenesis in zebrafish skin and intervertebral ligaments**

TEM analysis of skin biopsies of *ltbp1*<sup>-/-</sup>Δ29 and *ltbp1*<sup>-/-</sup>Δ35 zebrafish demonstrated an abnormal dermal collagen architecture showing a folded appearance of the typical plywood-like organization. (Figures 7A–7H). In contrast, TEM of the notochord sheet, a part of the intervertebral disc, shows normal diameters and structural organization of collagen type II (Figures S11E–S11H). Also, the immature collagen deposited by osteoblasts in the outer edges of the intervertebral ligament appears normally structured (Figures S11A–S11D). However, the mature collagen



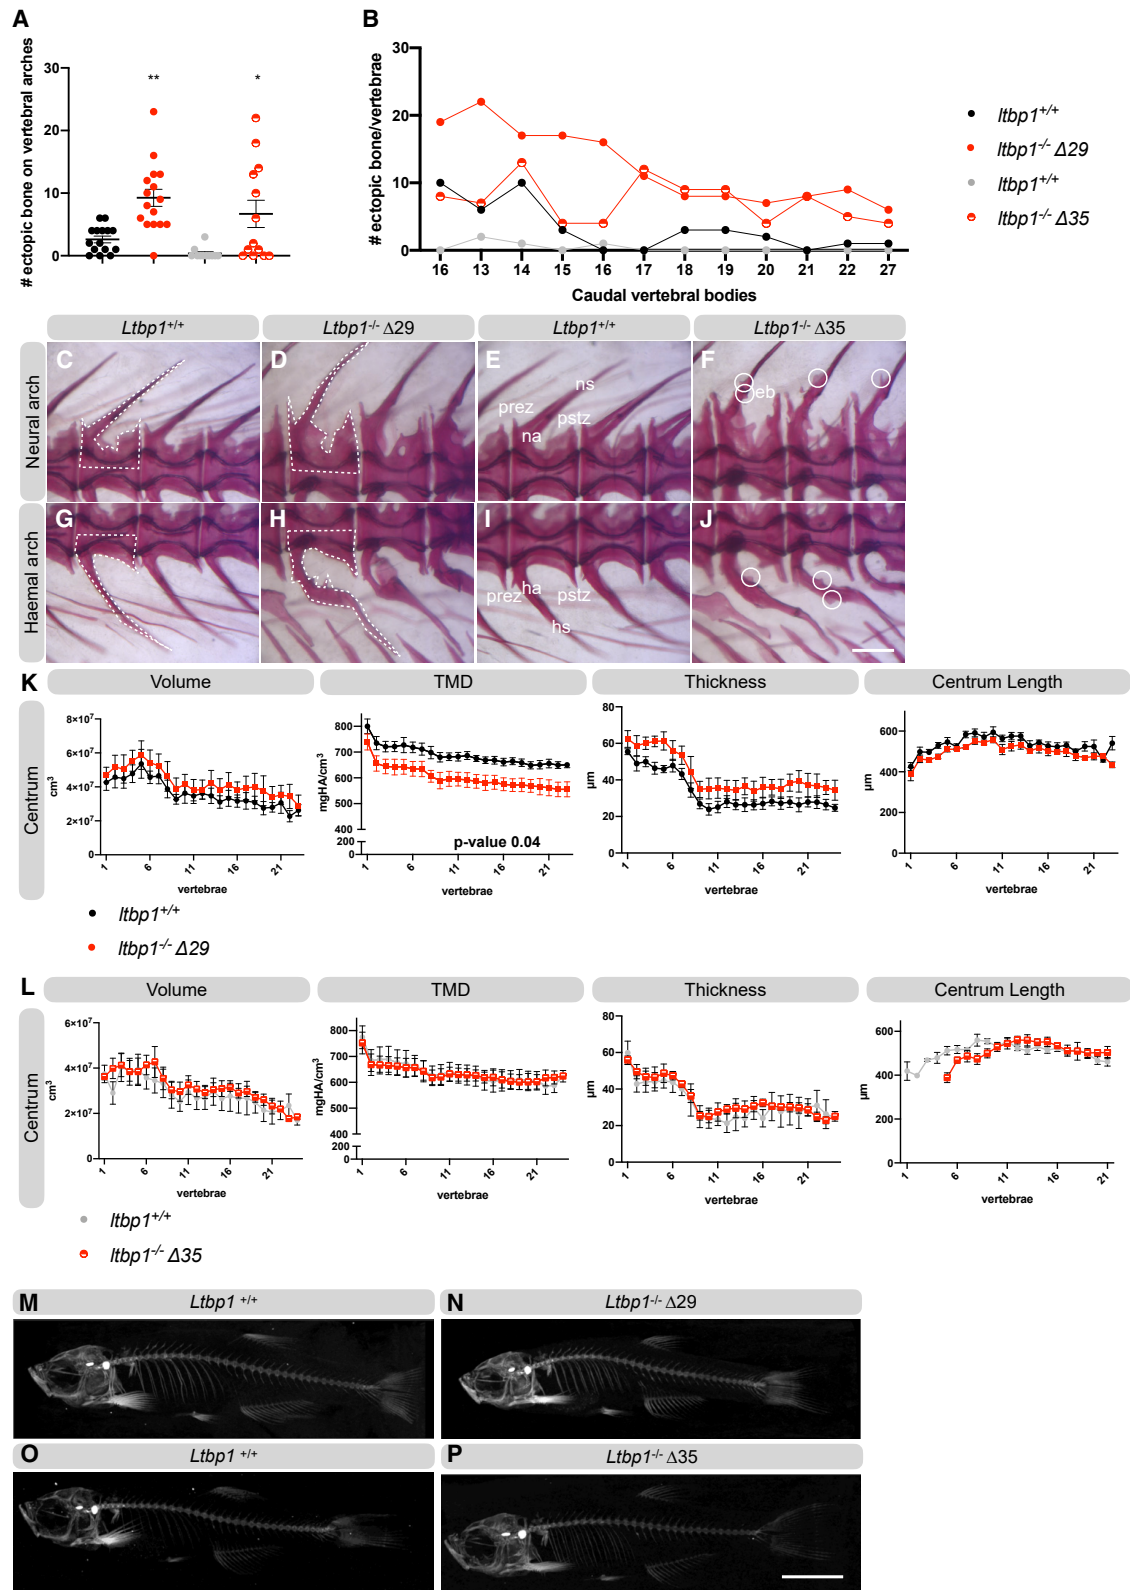

**Figure 6.** *Ltbp1*<sup>-/-</sup>Δ29 zebrafish show hypo-mineralization and voluminous vertebrae with ectopic bone

(A) Quantification of the amount of ectopic bone present on the neural and haemal arches of the caudal vertebrae of *ltbp1*<sup>-/-</sup>Δ29 and *ltbp1*<sup>-/-</sup>Δ35 zebrafish and corresponding WT siblings. The amount of ectopic bone is significantly increased in *ltbp1*<sup>-/-</sup>Δ29 and *ltbp1*<sup>-/-</sup>Δ35 zebrafish.

(B) Graphical representation of the amount of ectopic bone on the individually scored VBs of *ltbp1*<sup>-/-</sup>Δ29 and *ltbp1*<sup>-/-</sup>Δ35 zebrafish and corresponding WT siblings.

(legend continued on next page)

structure (Figures 7I–7P) consistently shows a lack of the plywood-like organization with a chaotic assembly of the collagen fibrils in intervertebral ligament samples from *ltbp1*<sup>-/-</sup>Δ29 and *ltbp1*<sup>-/-</sup>Δ35 zebrafish. Taken together, our experiments highlight a role for *ltbp1* in collagen architecture *in vivo* in zebrafish.

## Discussion

We describe an AR CL syndrome caused by bi-allelic truncating variants in *LTBP1*. The craniofacial features, short stature, brachydactyly, variable craniosynostosis, and variable mild heart defects clearly distinguish this AR CL syndrome from other subtypes of CL syndrome. Because of the pleiotropic manifestations, we propose the name *LTBP1*-related CL syndrome. The identified premature truncating variants are distributed across *LTBP1* and correspond to protein alterations in the second (family 4, c.1342C>T) and third EGF-like domains (family 1, c.4844del) and the 12<sup>th</sup> (family 3, c.3991\_3995del) and 13<sup>th</sup> calcium-binding EGF-like domains (family 2, c.4431T>A) of the long isoform of *LTBP1*.<sup>1</sup> We demonstrate distinct molecular consequences of truncating variants in *LTBP1* depending on their position within the gene. No NMD is observed for the c.4844del variant, allowing for rudimentary (altered) *LTBP1* fiber formation in the ECM. In contrast, NMD is observed in the c.1342C>T variant, resulting in an absence of *LTBP1* in the ECM layer. Mutant *LTBP1* protein produced by c.4844del or c.4431T>A *LTBP1* variants shows reduced binding affinity for the N-terminal regions of fibrillin-1 and fibrillin-2 causing loss of function.

Reduced *LTBP1* binding to fibrillin-containing microfibrils would yield in large latency complexes (LLCs) that fail to be targeted correctly to the ECM, resulting in their inappropriate activation. Therefore, we hypothesize that the increased TGFβ levels observed in cultured dermal fibroblasts of F1:IV-2 is the result of an unstable anchorage of *LTBP1* to fibrillin microfibrils. Our finding of activated TGFβ signaling in cultured dermal fibroblasts of F1:IV-2 that may still express a C-terminally truncated form of *LTBP1* is consistent with a previous study in murine skin. Transgenic protein production of a truncated *LTBP1* variant that is still capable to bind TGFβ but fails to interact with the

ECM because of lack of the known N- and C-terminal ECM-binding regions resulted in an excess of active TGFβ.<sup>57,58</sup> Moreover, strongly increased ECM production (as evidenced by mRNA expression and/or protein level of collagens, FBN1 and *LTBP2*) in cultured dermal fibroblasts expressing the c.4844del variant may be secondary to aberrant canonical TGFβ growth factor activation.<sup>55,56</sup> In contrast, absence of *LTBP1* in the ECM layer (c.1342>T variant) does not alter canonical TGFβ signaling and does not induce strong alterations of collagen I and III fiber incorporation in the ECM of cultured fibroblasts. Hence, functional redundancy of other *LTBP* family members may be sufficient for TGFβ transport and sequestering in absence of *LTBP1*.<sup>2</sup> Nevertheless, newly produced collagen might be degraded by other specific factors such as matrix metalloproteinases and trigger other pathological cascades.<sup>59</sup>

In addition, absence of *LTBP1* does not alter fibulin-4 deposition in the ECM layer, while the presence of altered *LTBP1* impedes fibulin-4 incorporation into the ECM. Fibulin-4 acts as an adaptor molecule to guide tropoelastin and lysyl oxidase to fibrillin-containing microfibrils.<sup>60,61</sup> *Efemp2*<sup>R/R</sup> mice have mild elastic fiber alterations<sup>62</sup> in line with the observation of mild elastic fiber defects upon ultrastructural analysis of a skin biopsy of the individual harboring the *LTBP1* c.4844del variant. Concomitantly, we observed increased deposition of *LTBP2* in the ECM. *LTBP2* is a known interaction partner of fibulin-5 and facilitates tropoelastin deposition in human dermal fibroblasts.<sup>14</sup> It is tempting to hypothesize that *LTBP2* and fibulin-5 might compensate for the loss of fibulin-4 incorporation in the ECM in human dermal fibroblasts. Further studies are needed to confirm the distinct molecular consequences related to a loss of *LTBP1* or altered *LTBP1* level in cultured dermal fibroblast samples derived from other diagnosed individuals with *LTBP1* variants in similar regions.

However, some differences in clinical features between F1:IV-2 and F4:II-1 may be at least partly TGFβ related. For instance, F1:IV-2 shows mitral valve prolapse (MVP), which was suggested to be caused by increased TGFβ activity in a mouse model of Marfan syndrome.<sup>63</sup> A homozygous premature truncation variant after 171 amino acids in *LTBP3* also causes MVP,<sup>64</sup> while a heterozygous missense mutation in *LTBP3* resulted only in a mildly thickened mitral valve with mild mitral regurgitation.<sup>23</sup> Skin fibroblast from individuals who harbor this less severe *LTBP3*

---

(C–J) Representative images of the neural and haemal arches on the vertebrae of *ltbp1*<sup>-/-</sup>Δ29 and *ltbp1*<sup>-/-</sup>Δ35 zebrafish and their respective WT siblings. Note that the shape of the neural and haemal part of the vertebrae is indicated with dashed lines. *ltbp1*<sup>-/-</sup>Δ29 zebrafish have more erratic and voluminous vertebral shapes than their respective WT siblings. Ectopic bone is indicated with a circle.

(K–L) Quantitative μCT analysis of the vertebral column in five *ltbp1*<sup>-/-</sup>Δ29 zebrafish versus five WT siblings and in five *ltbp1*<sup>-/-</sup>Δ35 zebrafish versus four WT siblings at the age of 4 months. The bone volume, tissue mineral density (TMD), and bone thickness were calculated from the vertebral centrum. The x axis represents individual abdominal and caudal VB along the anterior-posterior axis. The TMD is significantly reduced in the vertebral centrum of *ltbp1*<sup>-/-</sup>Δ29 zebrafish compared to WT siblings. In contrast, equal TMD is observed in the vertebral centrum of *ltbp1*<sup>-/-</sup>Δ35 zebrafish compared to WT siblings. Data were analyzed in the R statistical environment.

(M–P) Representative 2D μCT images of the skeleton of *ltbp1*<sup>-/-</sup>Δ29 and *ltbp1*<sup>-/-</sup>Δ35 zebrafish and corresponding WT siblings. Data are expressed as mean ± standard error of the mean (SEM) and analyzed in the R statistical environment in (K) and (L). Data are expressed as mean ± SD in (A). \*p value < 0.05, \*\*p value < 0.01. Two-tailed unpaired t test with Welch's correction was used for statistical analysis in (A). Eb, ectopic bone; ha, haemal arch; hs, haemal spine; HA, hydroxyapatite; na, neural arch; ns, neural spine; prez, prezygapophysis; pstz, postzygapophysis; vc, vertebral column.



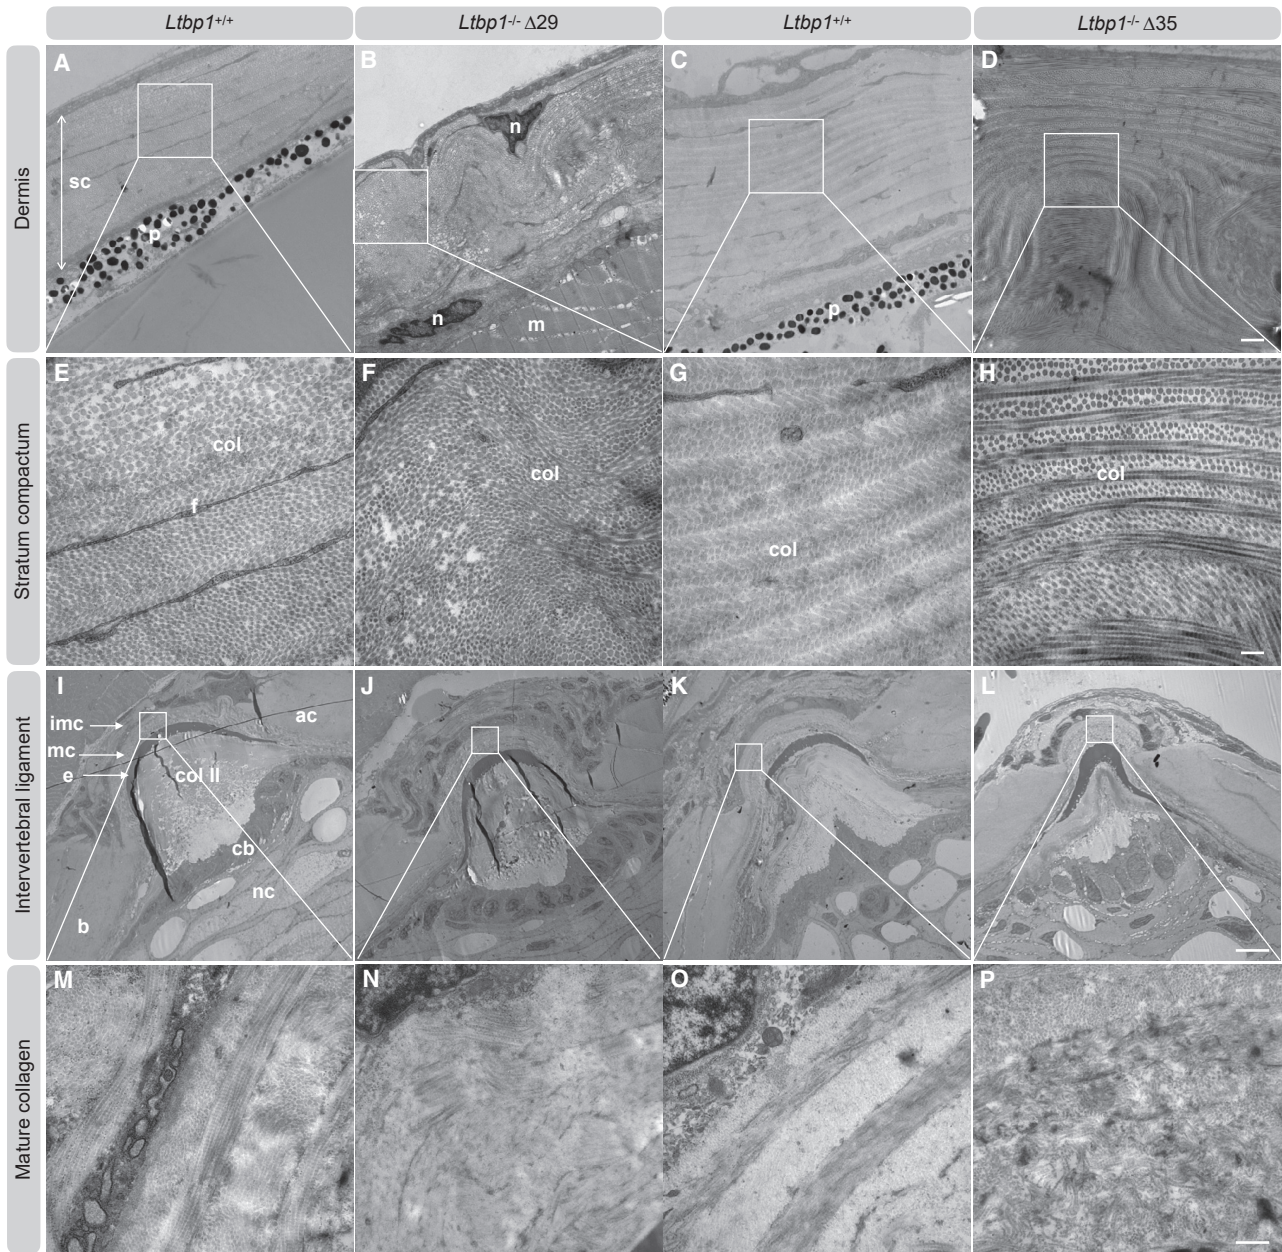

**Figure 7. LTBP1 deficiency causes abnormal collagen fibrillogenesis in skin and intervertebral ligaments**

(A–H) Representative images of ultrathin sections taken from the dermis of 4-months old adult *ltbp1*<sup>-/-</sup> Δ29 zebrafish, *ltbp1*<sup>-/-</sup> Δ35 zebrafish, and corresponding WT siblings. Increased interfibrillar spaces and disorganized collagen architecture are noted in *ltbp1*<sup>-/-</sup> Δ29 and *ltbp1*<sup>-/-</sup> Δ35 zebrafish samples. Col, collagen; f, fibroblast; m, muscle; n, nucleus; p, pigmentation; sc, stratum compactum. Scale represents 1 μm in (A)–(D) and scale represents 200 nm in (E)–(H).

(I–P) Representative images of ultrathin parasagittal sections showing internal structures of zebrafish vertebral centra and intervertebral ligament of 4-months-old adult *ltbp1*<sup>-/-</sup> Δ29 and *ltbp1*<sup>-/-</sup> Δ35 zebrafish and corresponding WT siblings. Note that the notochord sheet is composed of collagen type II. Collagen type II is secreted by the chordoblasts lining the notochord sheet on the inside and in between the chordocytes and the notochord sheet. Abnormal mature collagen architecture is noted in adult *ltbp1*<sup>-/-</sup> Δ29 and *ltbp1*<sup>-/-</sup> Δ35 zebrafish compared to corresponding WT siblings. Ac, autocenter; b, bone; cb, chordoblasts; colII, collagen type II (notochord sheet); e, outer elastin layer; imc, immature collagen; mc, mature collagen; nc, vacuolated notochord cells (chordocytes). Scale represents 200 μm in (I)–(L) and scale represents 500 nm in (M)–(P).

missense mutation also did not show any signs of increased total or activated levels of TGFβ,<sup>23</sup> suggesting that only the *LTBP3* truncation variant leads to activated TGFβ and MVP similar to our findings in F1:IV-2. In addition, the occurrence of hernias was reported to be a feature of neonates with Marfan syndrome,<sup>65–67</sup> a disorder sug-

gested to be generally driven by aberrant TGFβ activation. F4:II-1 did not present with mitral valve prolapse or hernias but was initially presented with deformities of the skull. Craniosynostosis, a pathology that is closely linked to dysregulated TGFβ signaling,<sup>68</sup> was also reported to be caused by a reduced bioavailability of TGFβ within the

bone matrix because of the genetic ablation of *Ltbp3* in mice.<sup>17,69</sup> Deformities of the skull were also reported in *Ltbp1* null mice.<sup>30</sup> These reports in mice are consistent with the idea of reduced TGF $\beta$  bioavailability in bone of F4:II-1. However, the mechanisms controlling the tissue bioavailability of TGF $\beta$  are most likely tissue specific. Depending on the tissue-specific ECM composition and biomechanical properties, LTBP deficiency may have different effects on TGF $\beta$  bioavailability. In addition, LTBP1 might have other, yet unknown functions that cannot be compensated by other LTBPs and are causative for the clinical features in the reported probands. These could include unknown roles in modulating the deposition of ECM components or cell-matrix interactions.

Little is known about the function of LTBP1 in chondrogenesis. LTBP1, fibrillin-1, and FN are localized in developing long bones of *R. Novergicus*. LTBP1 and fibrillin-1 are present in the longitudinal fibrillar structures in the outer periosteum and in the perichondrium and in the layer of osteoblasts adjacent to the surface of newly forming osteoid.<sup>70,71</sup> Many microfibrillar genes, including *LTBP2*, *LTBP3*, *ADAMTS10*, *ADAMTS17*, *ADAMTSL2*, *FBN1*, and *FBN2*, have been associated with short stature.<sup>72</sup> *FBN1* and *FBN2* variants might even cause opposite phenotypes depending on the domain harboring the pathogenic variant.<sup>73–76</sup> How these defects affect ECM interactions, microenvironment, and growth factor signaling pathways in chondrocytes is poorly understood.<sup>77</sup> Genes involved in isolated and syndromic forms of craniosynostosis suggest a link between fibroblast growth factor and TGF $\beta$  signaling dysregulation,<sup>68</sup> which suggests a delicate cellular and molecular interplay between osteoblastogenic and osteoclastogenic pathways.<sup>78</sup> Of note, most craniosynostosis syndromes do not present with clear cutaneous manifestation or short stature. In this context, growth factor signaling in fibroblasts may not be fully representative for the molecular consequences in osteogenic pathways. Our study, however, adds an additional contributor to the short stature and craniosynostosis phenotypes.

Our *in vivo* experiments furthermore provide evidence that *Ltbp1* is required for proper cutaneous and skeletal homeostasis in adult zebrafish. Both homozygous mutant zebrafish models have an abnormal dermal collagen architecture showing a folded plywood-like organization, indicating skin redundancy, the hallmark phenotype of CL syndrome, as well as abnormal fibrillogenesis in the intervertebral ligament. *Ltbp1*<sup>-/-</sup> $\Delta$ 29 zebrafish have vertebral hypomineralization, voluminous vertebrae, and ectopic bone formation. *Ltbp1*<sup>-/-</sup> $\Delta$ 35 zebrafish show normal mineralization but still display ectopic bone formed by intramembranous ossification. Increased vertebral volume in zebrafish associates with ECM defects.<sup>52</sup> *PLOD2* deficiency in zebrafish, phenotypically concordant with clinical findings in individuals with Bruck Syndrome, causes loss of the typical hour-glass-shape morphology in zebrafish due to excessive bone formation and therefore increases vertebral body thickness and disrupts type 1 collagen fibrillar organization in the

bone.<sup>52</sup> Collagen maturation defects, which are clearly observed in *ltbp1*<sup>-/-</sup> $\Delta$ 29 and *ltbp1*<sup>-/-</sup> $\Delta$ 35 zebrafish, could potentially contribute to the observed ectopic bone formation. However, neither craniofacial abnormalities nor craniosynostosis were observed in both homozygous mutant zebrafish models. A possible explanation for the lack of these features could be the induction of genetic compensation mechanisms, which could partly rescue the craniosynostosis phenotype.<sup>79</sup> A recent study showed that knockdown of *ltbp1* leads to abnormal craniofacial cartilage structures in zebrafish embryos,<sup>80</sup> suggesting a role in cartilage development, which we did not observe in our models (data not shown). Considering the reduction of mutant *ltbp1* mRNA levels in *ltbp1*<sup>-/-</sup> $\Delta$ 29 and *ltbp1*<sup>-/-</sup> $\Delta$ 35 zebrafish (30%–10% of WT *Ltbp1* levels, respectively), an RNA-less *ltbp1* allele model, which would preclude activation of the genetic compensation mechanisms,<sup>81</sup> might be informative in this context. However, we cannot exclude the possibility that mutant *Ltbp1* might still retain some level of activity, mitigating the severity of the observed phenotype. The C-terminal TGF $\beta$ -binding domains, absent in *ltbp1*<sup>-/-</sup> $\Delta$ 29 zebrafish but present in *ltbp1*<sup>-/-</sup> $\Delta$ 35 zebrafish, may play a role in the observed differences in the bone mineral density. Indeed, excessive TGF $\beta$  signaling has been implicated in the pathogenesis of osteogenesis imperfecta (MIM: 259420).<sup>82</sup> Unfortunately, this hypothesis could not be confirmed nor rejected because of lack of suitable zebrafish TGF $\beta$  antibodies. Further studies should delineate whether aberrant TGF $\beta$  signaling exists in *ltbp1*<sup>-/-</sup> $\Delta$ 29 zebrafish using a luciferase reporter assay driven by a TGF $\beta$  responsive promoter as feasible readout. Remarkably, *Ltbp1L*<sup>-/-</sup> and *Ltbp1*<sup>-/-</sup> mice present with truncus arteriosus, interrupted aortic arch, and perinatal lethality. Our observations imply differences in functional redundancy of LTBP family members or other compensatory mechanisms for *Ltbp1* deficiency in mice versus humans and teleosts.

In conclusion, we identified bi-allelic truncating variants in *LTBP1* as disease causing for CL syndrome with altered skeletal development. Data from *in vitro* experiments on cultured fibroblasts show that different *LTBP1*-truncating variants have distinct molecular signatures on ECM development and TGF $\beta$  signaling, depending on the absence or presence of mutated protein. Moreover, *ltbp1* deficiency in zebrafish confirms a prominent role for *Ltbp1* in skeletal morphogenesis *in vivo*. Taken together, our data underscore the importance of the LTBP1 LLC in matrix assembly and bone homeostasis.

#### Data and code availability

The published article includes all data and code generated or analyzed during this study.

#### Supplemental information

Supplemental information can be found online at <https://doi.org/10.1016/j.ajhg.2021.04.016>.



## Acknowledgments

The authors wish to indicate our deep gratitude to the probands and their families for their contribution to the study. We specially want to thank Jan Willem Bek for implementing the  $\mu$ CT scanning technique in our zebrafish phenotypic studies. Moreover, we want to thank Velislava Zoteva, Petra Vermassen, Hanna De Saffel, Lisa Caboor, and Myriam Claes for their technical support. B.C. is a senior clinical investigator of the Research Foundation Flanders. This work was supported by a starting grant of the Special Research Fund of Ghent University (01N04516C to B.C.), a Methusalem grant (BOF-MET2015000401) from the Special Research Fund of Ghent University, a junior fundamental research project grant of the Fund for Scientific Research (G035620N), grants from Deutsche Forschungsgemeinschaft (DFG, German Research Foundation) project numbers 73111208 (SFB 829/ B12), 397484323 (TRR 259/ B09), and FOR2722/ C2 to G.S., and the European Union's Horizon 2020 research and innovation program under the Marie Skłodowska-Curie grant agreement no. 794365 to P.S. F3 was collected as part of the SYNAPS Study Group collaboration funded by The Wellcome Trust and strategic award (Synaptopathies) funding (WT093205 MA and WT104033AIA), and research was conducted as part of the Queen Square Genomics group at University College London, supported by the National Institute for Health Research University College London Hospitals Biomedical Research Centre. H.H. is funded by the MRC (MR/S01165X/1, MR/S005021/1, and G0601943), the National Institute for Health Research University College London Hospitals Biomedical Research Centre, Rosetree Trust, Ataxia UK, MSA Trust, Brain Research UK, Sparks GOSH Charity, Muscular Dystrophy UK (MDUK), and Muscular Dystrophy Association (MDA USA). W.G.N. is supported by the Manchester NIHR BRC (IS-BRC-1215-20007).

## Declaration of interests

P.S. is an employee of Bruker-microCT. The remaining authors declare no competing interests.

Received: January 23, 2021

Accepted: April 22, 2021

Published: May 14, 2021

## Web resources

HGVS, <http://varnomen.hgvs.org/>

MAPP, <http://mendel.stanford.edu/sidowlab/downloads/MAPP/index.html>

OMIM, <https://omim.org/>

PhD-SNP, <https://snps.biofold.org/phd-snp/phd-snp.html>

PolyPhen-2, <http://genetics.bwh.harvard.edu/pph2/>

REVEL, <https://sites.google.com/site/revelgenomics/>

SIFT, <https://sift.bii.a-star.edu.sg/>

SNAP, <https://www.rostlab.org/services/SNAP/>

## References

- Rifkin, D.B., Rifkin, W.J., and Zilberberg, L. (2018). LTBP5 in biology and medicine: LTBP diseases. *Matrix Biol.* 71–72, 90–99.
- Saharinen, J., and Keski-Oja, J. (2000). Specific sequence motif of 8-Cys repeats of TGF-beta binding proteins, LTBP5, creates a hydrophobic interaction surface for binding of small latent TGF-beta. *Mol. Biol. Cell* 11, 2691–2704.
- Isogai, Z., Ono, R.N., Ushiro, S., Keene, D.R., Chen, Y., Mazziere, R., Charbonneau, N.L., Reinhardt, D.P., Rifkin, D.B., and Sakai, L.Y. (2003). Latent transforming growth factor beta-binding protein 1 interacts with fibrillin and is a microfibril-associated protein. *J. Biol. Chem.* 278, 2750–2757.
- Ono, R.N., Sengle, G., Charbonneau, N.L., Carlberg, V., Bächinger, H.P., Sasaki, T., Lee-Arteaga, S., Zilberberg, L., Rifkin, D.B., Ramirez, F., et al. (2009). Latent transforming growth factor beta-binding proteins and fibulins compete for fibrillin-1 and exhibit exquisite specificities in binding sites. *J. Biol. Chem.* 284, 16872–16881.
- Hirani, R., Hanssen, E., and Gibson, M.A. (2007). LTBP-2 specifically interacts with the amino-terminal region of fibrillin-1 and competes with LTBP-1 for binding to this microfibrillar protein. *Matrix Biol.* 26, 213–223.
- Dallas, S.L., Sivakumar, P., Jones, C.J., Chen, Q., Peters, D.M., Mosher, D.F., Humphries, M.J., and Kielty, C.M. (2005). Fibronectin regulates latent transforming growth factor-beta (TGF beta) by controlling matrix assembly of latent TGF beta-binding protein-1. *J. Biol. Chem.* 280, 18871–18880.
- Massam-Wu, T., Chiu, M., Choudhury, R., Chaudhry, S.S., Baldwin, A.K., McGovern, A., Baldock, C., Shuttleworth, C.A., and Kielty, C.M. (2010). Assembly of fibrillin microfibrils governs extracellular deposition of latent TGF beta. *J. Cell Sci.* 123, 3006–3018.
- Noda, K., Dabovic, B., Takagi, K., Inoue, T., Horiguchi, M., Hirai, M., Fujikawa, Y., Akama, T.O., Kusumoto, K., Zilberberg, L., et al. (2013). Latent TGF-beta binding protein 4 promotes elastic fiber assembly by interacting with fibulin-5. *Proc. Natl. Acad. Sci. USA* 110, 2852–2857.
- Bultmann-Mellin, I., Conradi, A., Maul, A.C., Dinger, K., Wempe, F., Wohl, A.P., Imhof, T., Wunderlich, F.T., Bunck, A.C., Nakamura, T., et al. (2015). Modeling autosomal recessive cutis laxa type 1C in mice reveals distinct functions for Ltbp-4 isoforms. *Dis. Model. Mech.* 8, 403–415.
- Bultmann-Mellin, I., Essers, J., van Heijningen, P.M., von Melchner, H., Sengle, G., and Sterner-Kock, A. (2016). Function of Ltbp-4L and fibulin-4 in survival and elastogenesis in mice. *Dis. Model. Mech.* 9, 1367–1374.
- Dabovic, B., Robertson, I.B., Zilberberg, L., Vassallo, M., Davis, E.C., and Rifkin, D.B. (2015). Function of latent TGFbeta binding protein 4 and fibulin 5 in elastogenesis and lung development. *J. Cell. Physiol.* 230, 226–236.
- Kumra, H., Nelea, V., Hakami, H., Pagliuzza, A., Djokic, J., Xu, J., Yanagisawa, H., and Reinhardt, D.P. (2019). Fibulin-4 exerts a dual role in LTBP-4L-mediated matrix assembly and function. *Proc. Natl. Acad. Sci. USA* 116, 20428–20437.
- Shin, S.J., and Yanagisawa, H. (2019). Recent updates on the molecular network of elastic fiber formation. *Essays Biochem.* 63, 365–376.
- Hirai, M., Horiguchi, M., Ohbayashi, T., Kita, T., Chien, K.R., and Nakamura, T. (2007). Latent TGF-beta-binding protein 2 binds to DANCE/fibulin-5 and regulates elastic fiber assembly. *EMBO J.* 26, 3283–3295.
- Todorovic, V., Frendewey, D., Gutstein, D.E., Chen, Y., Freyer, L., Finnegan, E., Liu, F., Murphy, A., Valenzuela, D., Yancopoulos, G., and Rifkin, D.B. (2007). Long form of latent TGF-beta binding protein 1 (Ltbp1L) is essential for cardiac outflow tract septation and remodeling. *Development* 134, 3723–3732.

16. Dabovic, B., Levasseur, R., Zambuto, L., Chen, Y., Karsenty, G., and Rifkin, D.B. (2005). Osteopetrosis-like phenotype in latent TGF-beta binding protein 3 deficient mice. *Bone* 37, 25–31.
17. Dabovic, B., Chen, Y., Colarossi, C., Zambuto, L., Obata, H., and Rifkin, D.B. (2002). Bone defects in latent TGF-beta binding protein (Ltbp)-3 null mice; a role for Ltbp in TGF-beta presentation. *J. Endocrinol.* 175, 129–141.
18. Shipley, J.M., Mecham, R.P., Maus, E., Bonadio, J., Rosenbloom, J., McCarthy, R.T., Baumann, M.L., Frankfater, C., Segade, F., and Shapiro, S.D. (2000). Developmental expression of latent transforming growth factor beta binding protein 2 and its requirement early in mouse development. *Mol. Cell. Biol.* 20, 4879–4887.
19. Inoue, T., Ohbayashi, T., Fujikawa, Y., Yoshida, H., Akama, T.O., Noda, K., Horiguchi, M., Kameyama, K., Hata, Y., Takahashi, K., et al. (2014). Latent TGF- $\beta$  binding protein-2 is essential for the development of ciliary zonule microfibrils. *Hum. Mol. Genet.* 23, 5672–5682.
20. Ali, M., McKibbin, M., Booth, A., Parry, D.A., Jain, P., Riazuddin, S.A., Hejtmancik, J.F., Khan, S.N., Firasat, S., Shires, M., et al. (2009). Null mutations in LTBP2 cause primary congenital glaucoma. *Am. J. Hum. Genet.* 84, 664–671.
21. Désir, J., Sznajer, Y., Depasse, F., Roulez, F., Schrooyen, M., Meire, F., and Abramowicz, M. (2010). LTBP2 null mutations in an autosomal recessive ocular syndrome with megalocornea, spherophakia, and secondary glaucoma. *Eur. J. Hum. Genet.* 18, 761–767.
22. Haji-Seyed-Javadi, R., Jelodari-Mamaghani, S., Paylakhi, S.H., Yazdani, S., Nilforushan, N., Fan, J.B., Klotzle, B., Mahmoudi, M.J., Ebrahimian, M.J., Chelich, N., et al. (2012). LTBP2 mutations cause Weill-Marchesani and Weill-Marchesani-like syndrome and affect disruptions in the extracellular matrix. *Hum. Mutat.* 33, 1182–1187.
23. McInerney-Leo, A.M., Le Goff, C., Leo, P.J., Kenna, T.J., Keith, P., Harris, J.E., Steer, R., Bole-Feyso, C., Nitschke, P., Kilty, C., et al. (2016). Mutations in LTBP3 cause acromicric dysplasia and geleophysic dysplasia. *J. Med. Genet.* 53, 457–464.
24. Noor, A., Windpassinger, C., Vitcu, I., Orlic, M., Rafiq, M.A., Khalid, M., Malik, M.N., Ayub, M., Alman, B., and Vincent, J.B. (2009). Oligodontia is caused by mutation in LTBP3, the gene encoding latent TGF-beta binding protein 3. *Am. J. Hum. Genet.* 84, 519–523.
25. Guo, D.C., Regalado, E.S., Pinard, A., Chen, J., Lee, K., Rigelsky, C., Zilberberg, L., Hostetler, E.M., Aldred, M., Wallace, S.E., et al.; University of Washington Center for Mendelian Genomics (2018). LTBP3 Pathogenic Variants Predispose Individuals to Thoracic Aortic Aneurysms and Dissections. *Am. J. Hum. Genet.* 102, 706–712.
26. Ritelli, M., Cammarata-Scalisi, F., Cinquina, V., and Colombi, M. (2019). Clinical and molecular characterization of an 18-month-old infant with autosomal recessive cutis laxa type 1C due to a novel LTBP4 pathogenic variant, and literature review. *Mol. Genet. Genomic Med.* 7, e00735.
27. Callewaert, B., Su, C.T., Van Damme, T., Vlummens, P., Malfait, F., Vanakker, O., Schulz, B., Mac Neal, M., Davis, E.C., Lee, J.G., et al. (2013). Comprehensive clinical and molecular analysis of 12 families with type 1 recessive cutis laxa. *Hum. Mutat.* 34, 111–121.
28. Su, C.T., Huang, J.W., Chiang, C.K., Lawrence, E.C., Levine, K.L., Dabovic, B., Jung, C., Davis, E.C., Madan-Khetarpal, S., and Urban, Z. (2015). Latent transforming growth factor binding protein 4 regulates transforming growth factor beta receptor stability. *Hum. Mol. Genet.* 24, 4024–4036.
29. Horiguchi, M., Todorovic, V., Hadjiolova, K., Weiskirchen, R., and Rifkin, D.B. (2015). Abrogation of both short and long forms of latent transforming growth factor-beta binding protein-1 causes defective cardiovascular development and is perinatally lethal. *Matrix Biol.* 43, 61–70.
30. Drews, F., Knöbel, S., Moser, M., Muhlack, K.G., Mohren, S., Stoll, C., Bosio, A., Gressner, A.M., and Weiskirchen, R. (2008). Disruption of the latent transforming growth factor-beta binding protein-1 gene causes alteration in facial structure and influences TGF-beta bioavailability. *Biochim. Biophys. Acta* 1783, 34–48.
31. Dietzel, E., Weiskirchen, S., Floehr, J., Horiguchi, M., Todorovic, V., Rifkin, D.B., Jahnen-Dechent, W., and Weiskirchen, R. (2017). Latent TGF- $\beta$  binding protein-1 deficiency decreases female fertility. *Biochem. Biophys. Res. Commun.* 482, 1387–1392.
32. Biesecker, L.G., Adam, M.P., Alkuraya, F.S., Amemiya, A.R., Bamshad, M.J., Beck, A.E., Bennett, J.T., Bird, L.M., Carey, J.C., Chung, B., et al. (2021). A dyadic approach to the delineation of diagnostic entities in clinical genomics. *Am. J. Hum. Genet.* 108, 8–15.
33. Sobreira, N., Schiettecatte, F., Valle, D., and Hamosh, A. (2015). GeneMatcher: a matching tool for connecting investigators with an interest in the same gene. *Hum. Mutat.* 36, 928–930.
34. Mencacci, N.E., Kamsteeg, E.J., Nakashima, K., R'Bibo, L., Lynch, D.S., Balint, B., Willemsen, M.A., Adams, M.E., Wiethoff, S., Suzuki, K., et al. (2016). De Novo Mutations in PDE10A Cause Childhood-Onset Chorea with Bilateral Striatal Lesions. *Am. J. Hum. Genet.* 98, 763–771.
35. Monies, D., Abouelhoda, M., Assoum, M., Moghrabi, N., Raifullah, R., Almontashiri, N., Alowain, M., Alzaidan, H., Alsayed, M., Subhani, S., et al. (2019). Lessons Learned from Large-Scale, First-Tier Clinical Exome Sequencing in a Highly Consanguineous Population. *Am. J. Hum. Genet.* 104, 1182–1201.
36. Huyseune, A., and Sire, J.Y. (1992). Bone and cartilage resorption in relation to tooth development in the anterior part of the mandible in cichlid fish: a light and TEM study. *Anat. Rec.* 234, 1–14.
37. Sengle, G., Charbonneau, N.L., Ono, R.N., Sasaki, T., Alvarez, J., Keene, D.R., Bächinger, H.P., and Sakai, L.Y. (2008). Targeting of bone morphogenetic protein growth factor complexes to fibrillin. *J. Biol. Chem.* 283, 13874–13888.
38. Hiepen, C., Jatzlau, J., Hildebrandt, S., Kampfrath, B., Goktas, M., Murgai, A., Cuellar Camacho, J.L., Haag, R., Ruppert, C., Sengle, G., et al. (2019). BMPR2 acts as a gatekeeper to protect endothelial cells from increased TGF $\beta$  responses and altered cell mechanics. *PLoS Biol.* 17, e3000557.
39. Mularczyk, E.J., Singh, M., Godwin, A.R.F., Galli, F., Humphreys, N., Adamson, A.D., Mironov, A., Cain, S.A., Sengle, G., Boot-Handford, R.P., et al. (2018). ADAMTS10-mediated tissue disruption in Weill-Marchesani syndrome. *Hum. Mol. Genet.* 27, 3675–3687.
40. Pilecki, B., Holm, A.T., Schlosser, A., Moeller, J.B., Wohl, A.P., Zuk, A.V., Heumüller, S.E., Wallis, R., Moestrup, S.K., Sengle, G., et al. (2016). Characterization of Microfibrillar-associated Protein 4 (MFAP4) as a Tropoelastin- and Fibrillin-binding Protein Involved in Elastic Fiber Formation. *J. Biol. Chem.* 291, 1103–1114.

41. Vanhauwaert, S., Van Peer, G., Rihani, A., Janssens, E., Rondou, P., Lefever, S., De Paepe, A., Coucke, P.J., Speleman, F., Vandesompele, J., and Willaert, A. (2014). Expressed repeat elements improve RT-qPCR normalization across a wide range of zebrafish gene expression studies. *PLoS ONE* *9*, e109091.
42. Syx, D., Van Damme, T., Symoens, S., Maiburg, M.C., van de Laar, I., Morton, J., Suri, M., Del Campo, M., Hausser, I., Hermanns-Lê, T., et al. (2015). Genetic heterogeneity and clinical variability in musculocontractural Ehlers-Danlos syndrome caused by impaired dermatan sulfate biosynthesis. *Hum. Mutat.* *36*, 535–547.
43. Schindelin, J., Arganda-Carreras, I., Frise, E., Kaynig, V., Longair, M., Pietzsch, T., Preibisch, S., Rueden, C., Saalfeld, S., Schmid, B., et al. (2012). Fiji: an open-source platform for biological-image analysis. *Nat. Methods* *9*, 676–682.
44. Wohl, A.P., Troilo, H., Collins, R.F., Baldock, C., and Sengle, G. (2016). Extracellular Regulation of Bone Morphogenetic Protein Activity by the Microfibril Component Fibrillin-1. *J. Biol. Chem.* *291*, 12732–12746.
45. Boel, A., Steyaert, W., De Rocker, N., Menten, B., Callewaert, B., De Paepe, A., Coucke, P., and Willaert, A. (2016). BATCH-GE: Batch analysis of Next-Generation Sequencing data for genome editing assessment. *Sci. Rep.* *6*, 30330.
46. Beyens, A., Albuissou, J., Boel, A., Al-Essa, M., Al-Manea, W., Bonnet, D., Bostan, O., Boute, O., Busa, T., Canham, N., et al. (2018). Arterial tortuosity syndrome: 40 new families and literature review. *Genet. Med.* *20*, 1236–1245.
47. Westerfield, M., Doerry, E., Kirkpatrick, A.E., and Douglas, S.A. (1999). Zebrafish informatics and the ZFIN database. *Methods Cell Biol.* *60*, 339–355.
48. Hein, S.J., Lehmann, L.H., Kossack, M., Juergensen, L., Fuchs, D., Katus, H.A., and Hassel, D. (2015). Advanced echocardiography in adult zebrafish reveals delayed recovery of heart function after myocardial cryoinjury. *PLoS ONE* *10*, e0122665.
49. Wang, L.W., Huttner, I.G., Santiago, C.F., Kesteven, S.H., Yu, Z.Y., Feneley, M.P., and Fatkin, D. (2017). Standardized echocardiographic assessment of cardiac function in normal adult zebrafish and heart disease models. *Dis. Model. Mech.* *10*, 63–76.
50. Zhang, H., Dvornikov, A.V., Huttner, I.G., Ma, X., Santiago, C.F., Fatkin, D., and Xu, X. (2018). A Langendorff-like system to quantify cardiac pump function in adult zebrafish. *Dis. Model. Mech.* *11*, dmm034819.
51. Sakata-Haga, H., Uchishiba, M., Shimada, H., Tsukada, T., Mitani, M., Arikawa, T., Shoji, H., and Hatta, T. (2018). A rapid and nondestructive protocol for whole-mount bone staining of small fish and *Xenopus*. *Sci. Rep.* *8*, 7453.
52. Gistelincq, C., Witten, P.E., Huysseune, A., Symoens, S., Malfait, F., Larionova, D., Simoens, P., Dierick, M., Van Hoorebeke, L., De Paepe, A., et al. (2016). Loss of Type I Collagen Telopeptide Lysyl Hydroxylation Causes Musculoskeletal Abnormalities in a Zebrafish Model of Bruck Syndrome. *J. Bone Miner. Res.* *31*, 1930–1942.
53. Hur, M., Gistelincq, C.A., Huber, P., Lee, J., Thompson, M.H., Monstad-Rios, A.T., Watson, C.J., McMenamin, S.K., Willaert, A., Parichy, D.M., et al. (2017). MicroCT-based phenomics in the zebrafish skeleton reveals virtues of deep phenotyping in a distributed organ system. *eLife* *6*, e26014.
54. Popp, M.W., and Maquat, L.E. (2016). Leveraging Rules of Nonsense-Mediated mRNA Decay for Genome Engineering and Personalized Medicine. *Cell* *165*, 1319–1322.
55. Verrecchia, F., Chu, M.L., and Mauviel, A. (2001). Identification of novel TGF-beta /Smad gene targets in dermal fibroblasts using a combined cDNA microarray/promoter transactivation approach. *J. Biol. Chem.* *276*, 17058–17062.
56. Gressner, O.A., Lahme, B., Siluschek, M., Rehbein, K., Weiskirchen, R., and Gressner, A.M. (2009). Connective tissue growth factor is a Smad2 regulated amplifier of transforming growth factor beta actions in hepatocytes—but without modulating bone morphogenetic protein 7 signaling. *Hepatology* *49*, 2021–2030.
57. Mazzieri, R., Jurukovski, V., Obata, H., Sung, J., Platt, A., Annes, E., Karaman-Jurukovska, N., Gleizes, P.E., and Rifkin, D.B. (2005). Expression of truncated latent TGF-beta-binding protein modulates TGF-beta signaling. *J. Cell Sci.* *118*, 2177–2187.
58. Zeyer, K.A., and Reinhardt, D.P. (2015). Fibrillin-containing microfibrils are key signal relay stations for cell function. *J. Cell Commun. Signal.* *9*, 309–325.
59. Van Doren, S.R. (2015). Matrix metalloproteinase interactions with collagen and elastin. *Matrix Biol.* *44–46*, 224–231.
60. Choudhury, R., McGovern, A., Ridley, C., Cain, S.A., Baldwin, A., Wang, M.C., Guo, C., Mironov, A., Jr., Drymoussi, Z., Trump, D., et al. (2009). Differential regulation of elastic fiber formation by fibulin-4 and -5. *J. Biol. Chem.* *284*, 24553–24567.
61. Horiguchi, M., Inoue, T., Ohbayashi, T., Hirai, M., Noda, K., Marmorstein, L.Y., Yabe, D., Takagi, K., Akama, T.O., Kita, T., et al. (2009). Fibulin-4 conducts proper elastogenesis via interaction with cross-linking enzyme lysyl oxidase. *Proc. Natl. Acad. Sci. USA* *106*, 19029–19034.
62. Hanada, K., Vermeij, M., Garinis, G.A., de Waard, M.C., Kunen, M.G., Myers, L., Maas, A., Duncker, D.J., Meijers, C., Dietz, H.C., et al. (2007). Perturbations of vascular homeostasis and aortic valve abnormalities in fibulin-4 deficient mice. *Circ. Res.* *100*, 738–746.
63. Ng, C.M., Cheng, A., Myers, L.A., Martinez-Murillo, F., Jie, C., Bedja, D., Gabrielson, K.L., Hausladen, J.M., Mecham, R.P., Judge, D.P., and Dietz, H.C. (2004). TGF-beta-dependent pathogenesis of mitral valve prolapse in a mouse model of Marfan syndrome. *J. Clin. Invest.* *114*, 1586–1592.
64. Dugan, S.L., Temme, R.T., Olson, R.A., Mikhailov, A., Law, R., Mahmood, H., Noor, A., and Vincent, J.B. (2015). New recessive truncating mutation in LTBP3 in a family with oligodontia, short stature, and mitral valve prolapse. *Am. J. Med. Genet. A.* *167*, 1396–1399.
65. Parida, S.K., Kriss, V.M., and Hall, B.D. (1997). Hiatus/paraesophageal hernias in neonatal Marfan syndrome. *Am. J. Med. Genet.* *72*, 156–158.
66. Ming, J.E., McDonald-McGinn, D.M., Megerian, T.E., Driscoll, D.A., Elias, E.R., Russell, B.M., Irons, M., Emanuel, B.S., Markowitz, R.I., and Zackai, E.H. (1997). Skeletal anomalies and deformities in patients with deletions of 22q11. *Am. J. Med. Genet.* *72*, 210–215.
67. Herman, T.E., Siegel, M.J., Mathur, A., and Vachharajani, A. (2013). Neonatal marfan syndrome with hiatus hernia and intrathoracic stomach. *J. Perinatol.* *33*, 652–653.
68. Chim, H., Manjila, S., Cohen, A.R., and Gosain, A.K. (2011). Molecular signaling in pathogenesis of craniosynostosis: the role of fibroblast growth factor and transforming growth factor-beta. *Neurosurg. Focus* *31*, E7.
69. Dabovic, B., Chen, Y., Colarossi, C., Obata, H., Zambuto, L., Perle, M.A., and Rifkin, D.B. (2002). Bone abnormalities in latent TGF-[beta] binding protein (Ltbp)-3-null mice indicate

- a role for *Ltbp-3* in modulating TGF-[beta] bioavailability. *J. Cell Biol.* *156*, 227–232.
70. Dallas, S.L. (2000). Measuring interactions between ECM and TGF beta-like proteins. *Methods Mol. Biol.* *139*, 231–243.
  71. Dallas, S.L., Keene, D.R., Bruder, S.P., Saharinen, J., Sakai, L.Y., Mundy, G.R., and Bonewald, L.F. (2000). Role of the latent transforming growth factor beta binding protein 1 in fibrillin-containing microfibrils in bone cells in vitro and in vivo. *J. Bone Miner. Res.* *15*, 68–81.
  72. Stanley, S., Balic, Z., and Hubmacher, D. (2021). Acromelic dysplasias: how rare musculoskeletal disorders reveal biological functions of extracellular matrix proteins. *Ann. N Y Acad. Sci.* *1490*, 57–76.
  73. Le Goff, C., Mahaut, C., Wang, L.W., Allali, S., Abhyankar, A., Jensen, S., Zylberberg, L., Collod-Beroud, G., Bonnet, D., Alanay, Y., et al. (2011). Mutations in the TGFβ binding-protein-like domain 5 of FBN1 are responsible for acromicric and geleophysic dysplasias. *Am. J. Hum. Genet.* *89*, 7–14.
  74. Dietz, H.C., Cutting, G.R., Pyeritz, R.E., Maslen, C.L., Sakai, L.Y., Corson, G.M., Puffenberger, E.G., Hamosh, A., Nanthakumar, E.J., Curristin, S.M., et al. (1991). Marfan syndrome caused by a recurrent de novo missense mutation in the fibrillin gene. *Nature* *352*, 337–339.
  75. Putnam, E.A., Zhang, H., Ramirez, F., and Milewicz, D.M. (1995). Fibrillin-2 (FBN2) mutations result in the Marfan-like disorder, congenital contractural arachnodactyly. *Nat. Genet.* *11*, 456–458.
  76. Peeters, S., Decramer, A., Cain, S.A., Houpt, P., Verstreken, F., Noyez, J., Hermans, C., Jacobs, W., Lammens, M., Franssen, E., et al. (2020). Delineation of a new fibrillin-2-pathway with evidence for a role of *FBN2* in the pathogenesis of carpal tunnel syndrome. *J. Med. Genet.*, jmedgenet-2020-107085.
  77. Delhon, L., Mahaut, C., Goudin, N., Gaudas, E., Piquand, K., Le Goff, W., Cormier-Daire, V., and Le Goff, C. (2019). Impairment of chondrogenesis and microfibrillar network in *Adamts12* deficiency. *FASEB J.* *33*, 2707–2718.
  78. Beederman, M., Farina, E.M., and Reid, R.R. (2014). Molecular basis of cranial suture biology and disease: Osteoblastic and osteoclastic perspectives. *Genes Dis.* *1*, 120–125.
  79. El-Brolosy, M.A., and Stainier, D.Y.R. (2017). Genetic compensation: A phenomenon in search of mechanisms. *PLoS Genet.* *13*, e1006780.
  80. Xiong, Y.T., Sun, R.R., Li, J.Y., Wu, Y., and Zhang, J.J. (2020). Latent TGF-beta binding protein-1 plays an important role in craniofacial development. *J. Appl. Oral Sci.* Published online November 4, 2020. <https://doi.org/10.1590/1678-7757-2020-0262>.
  81. Tessadori, F., de Bakker, D.E.M., Barske, L., Nelson, N., Algra, H.A., Willekers, S., Nichols, J.T., Crump, J.G., and Bakkers, J. (2020). Zebrafish *prx1a* mutants have normal hearts. *Nature* *585*, E14–E16.
  82. Grafe, I., Yang, T., Alexander, S., Homan, E.P., Lietman, C., Jiang, M.M., Bertin, T., Munivez, E., Chen, Y., Dawson, B., et al. (2014). Excessive transforming growth factor-β signaling is a common mechanism in osteogenesis imperfecta. *Nat. Med.* *20*, 670–675.



**Supplemental information**

**Bi-allelic premature truncating variants in *LTBP1***

**cause cutis laxa syndrome**

**Lore Pottie, Christin S. Adamo, Aude Beyens, Steffen Lütke, Piyanoot Tapaneeyaphan, Adelbert De Clercq, Phil L. Salmon, Riet De Rycke, Alper Gezdirici, Elif Yilmaz Gulec, Naz Khan, Jill E. Urquhart, William G. Newman, Kay Metcalfe, Stephanie Efthymiou, Reza Maroofian, Najwa Anwar, Shazia Maqbool, Fatima Rahman, Ikhlass Altweijri, Monerah Alsaleh, Sawsan Mohamed Abdullah, Mohammad Al-Owain, Mais Hashem, Henry Houlden, Fowzan S. Alkuraya, Patrick Sips, Gerhard Sengle, and Bert Callewaert**

## Supplemental Note: Case Reports

### Family 1

Individual F1:II-2 is the daughter of a healthy consanguineous couple (first cousins) of Turkish origin. She was born at term after an unfollowed, but uneventful pregnancy by cesarean section. Birth weight was 3000g (P56; +0,16), length 50 cm (P58; +0,2SD). She presented with congenital diaphragmatic hernia (Morgagni) and bilateral inguinal hernia; the latter was corrected at age 6 months. At 12 months old, she was operated for the first time for the diaphragmatic hernia, but due to recurrence, surgery was repeated at the age of 18 months. Neuromotor development was normal. Clinical examination was at age 3 years and 4 months old showed mild cutis laxa and coarse craniofacial features, including a high forehead, frontal bossing, sagging cheeks, downslanted palpebral fissures, prominent supra-orbital ridges, a wide nasal bridge with broad nasal tip, long smooth philtrum, prominent nasolabial folds, and a broad mouth with thick lower lip vermillion. Several skeletal abnormalities were noticed, including short stature, ovoid-shaped vertebral bodies, brachydactyly, clinodactyly of the fifth finger, scoliosis, lumbar hyperlordosis, genua vara and joint hypermobility. X-ray images of the skull showed a copper beaten calvarium and a prominent coronal suture at the age of 3 years. Her height was 88 cm (P2; -2,19SD), her weight 12,450kg (P5; -1,38SD) and her OFC 50cm (P77; +0,72SD). Echocardiography showed mitral and tricuspid insufficiency with flattening of both valves during systole. Abdominal echography showed a caudally implanted and small right kidney. Vision and hearing were normal. Exome sequencing revealed the presence of a homozygous *LTBP1* frameshift variant (NM\_206943.4:c.4844del (p.Asn1615Ilefs\*23)).

### Family 2

Family 2 consists of 4 affected individuals from two different couples from a large consanguineous family. Individual F2:V-3 is the third child from the first couple, who are first cousins through their mother and the father of the second family and second cousins through their father and the mother of the second family. Their first child died of an unknown cause. F2:V-3 was born after an uneventful pregnancy at 40 weeks of gestation. Her birth weight was 2520g (P4; -1,72SD), other anthropometric parameters were unknown. She presented with recurrent chest infections in the first few weeks of life and a diagnosis of cystic fibrosis was confirmed. Following referral to a geneticist at four months she was noted to have cutis laxa, craniosynostosis of the coronal sutures, short stature and craniofacial

dysmorphism. Facial features were overtly coarse and included a long face, sagging cheeks, downslanted palpebral fissures, prominent supraorbital ridges, proptosis, synophris and arch-shaped eyebrows. Eyelashes were strikingly long. She showed a prominent nose with convex nasal ridge, wide nasal bridge, broad nasal tip, long philtrum and thick lips. She had a cleft hard and soft palate. Other skeletal features included brachydactyly, 5<sup>th</sup> finger clinodactyly, syndactyly of the 2,3 and 4 toe and hip dislocation. She had bilateral inguinal hernia. Echocardiographic evaluation showed a mild concentric left ventricular hypertrophy. Neuromotor development was normal but she follows special education for learning difficulties. Mixed conductive and sensorineural hearing loss is present for which she has hearing aids. Ophthalmological evaluation showed the presence of hypermetropia. Additionally, she was diagnosed with myelofibrosis. Molecular analysis of the recurrent *FGFR3* Pro250Arg variant was normal. The youngest sibling, F2:V-4, was born after an uneventful pregnancy at 38 weeks of gestation and weighed 3000g. She presented with a squint at 15 months. Ophthalmological assessment revealed blindness secondary to optic nerve hypoplasia. She followed special education, had severe autism and no speech. She has mild conductive hearing loss. Craniofacial features included synophris, long eyelashes, a long face, thick lips, large nose and high (intact) palate. She had cutis laxa with a lax abdominal wall. She had no documented craniosynostosis, but clinically there was the impression of mild bitemporal narrowing. She had brachydactyly.

Individuals F2:V-8 and F2:V-9 are siblings from the second couple of this family. Both siblings displayed characteristics similar to each other and their cousins. Both were born after term, uncomplicated pregnancies with similar birth weights of 3270g. F2:V-8 presented with craniosynostosis of the coronal, sagittal and lambdoid sutures, while in F2:V-9 only the coronal suture was involved. A complex front orbital advancement was performed in the her. Both shared the typical craniofacial characteristics observed in other families including a coarse face, synophris, proptosis, long eyelashes, sagging cheeks, thick lips, prominent nose with convex nasal ridge, and broad nasal tip. F2:V-9 had a cleft soft palate with minor extension to the hard part, while his sister only had a highly arched palate. Skeletal abnormalities were the same in both sibs with brachydactyly, 5<sup>th</sup> finger clinodactyly and syndactyly of the 2<sup>nd</sup>, 3<sup>rd</sup> and 4<sup>th</sup> toe. Echocardiography was normal in F2:V-9 but not performed in F2:V-8. Both wore hearing aids for conductive hearing loss secondary to otitis media. F2:V-8 had optic nerve hypoplasia

and F2:V-9 had optic nerve atrophy with a visual acuity of 6/60. Cutis laxa and inguinal hernia were present in both siblings. In addition, F2:V-8 was diagnosed with left hydroureter and right duplex kidney.

In this family, homozygosity mapping showed a shared 22.9Mb homozygous region on chromosome 2 (20,605,248-43,530,418) between the affected individuals, which is absent in unaffected family members. NGS exome sequencing subsequently identified a homozygous nonsense *LTBP1* variant NM\_206943.4: c.4431T>A (p.Cys1477\*).

### Family 3

Family 3 consists of a 1,6 year old boy (F3:II-1) and a 4 year old girl (F3:II-2) from a consanguineous family of Pakistani descent. The pregnancy of the first child was complicated by a vaginal bleeding. Both presented at the age of 6 months with craniosynostosis involving the right coronal and sagittal suture. The overall head shape was deformed and there was a 3<sup>th</sup> and 4<sup>th</sup> nerve palsy resulting in ptosis and squint. They displayed craniofacial features similar to our other families, with a coarse, long face, broad forehead, proptosis, arched eyebrows, sagging cheeks, microretrognathia, downslanting palpebral fissures, characteristic prominent nose (broad nasal bridge and tip), eyelashes and lips (thick upper and lower lip vermillion). In addition, protruding ears with large earlobes were observed. Both showed cutis laxa and deep palmar creases. F3:II-2 had a height of 95cm (P9; -1,36SD), weight of 14kg (P14; -1,09SD) and OFC of 48,5cm (P24; -0,71SD). Her arm span is 88cm, the pubis-ground distance 45cm and sitting height is 56cm. Her brother's length was 87cm (P90; +1,30SD), his weight 12kg (P54; +0,11SD) and his OFC 47cm (P25; -0,68SD). Skeletal features included brachydactyly, 5<sup>th</sup> finger clinodactyly, syndactyly of the 4<sup>th</sup> and 5<sup>th</sup> toes, joint hyperlaxity and genua vara. Heart auscultation revealed a loud P2, but echocardiography was not performed. Both display delayed developmental milestones with independent sitting age 12 months. Walking was achieved at ages 17 and 24 months, respectively. In the oldest sib, there was no evidence of any learning difficulties. Other clinical features included severe feeding problems, pallor and prune belly. In addition, F3:II-2 was diagnosed with moderate secundum atrial septal defect (ASD). ES identified a homozygous *LTBP1* frameshift variant resulting from a 5bp deletion (NM\_206943.4: c.3991\_3995del (p.Thr1331Asnfs\*20)) in both siblings.

### Family 4



Individual F4:II-1 is a 2 year old girl born to consanguineous parents of Saudi Arabic descent. She was born after an uneventful pregnancy at 39 weeks of gestation. At birth, marked craniofacial dysmorphism, craniosynostosis with hydrocephalus and cutis laxa were evident. The craniosynostosis involved a near complete fusion of the major sutures, involving the metopic, sagittal, coronal, lambdoid and squamosal suture. CT imaging of the skull showed a striking copper beaten appearance. The person received a ventriculoperitoneal shunt at the age of 2 months followed by successful corrective surgery at the age of one year. Clinical examination at the age of 21 months showed distinctive craniofacial features including a coarse face, sparse hair with low anterior hairline, long eyelashes, prominent eyes, broad nasal bridge and tip, a long and smooth philtrum, a tented upper lip with thick lower lip vermilion, protruding ears with overfolded helices, and hypotelorism. She presented with mild cutis laxa with prominent palmar creases, a distended abdomen and flat nipples. Skeletal abnormalities included short stature, a short thorax with pectus excavatum, clinodactyly, genua vara and hypermobile joints. An echocardiography performed at 21 months was normal, but she has history of a small ASD which was treated conservatively. She showed mild motor developmental delay with first independent sitting at the age of 13 months. A brain MRI showed normal major brain structures, but prominent Chiari I malformation and possible distal aqueduct stenosis. She had normal hearing and vision. She experiences some mild feeding difficulties due to poor appetite. A homozygous *LTBP1* nonsense (NM\_206943.4: c.1342C>T, p.(Gln448\*)) variant was identified.

Supplemental Data include 11 supplemental figures and 4 supplemental tables.

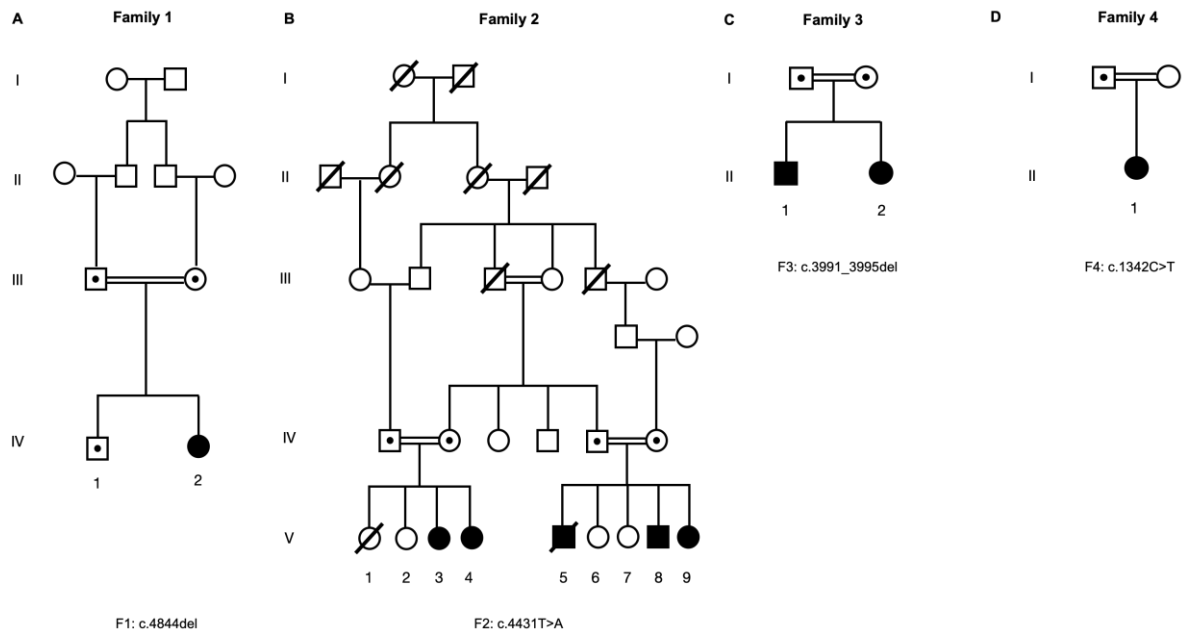

**Figure S1: Pedigrees of the reported families.** (A-D) Pedigree analysis of affected individuals in four unrelated consanguineous families carrying *LTBP1* variants confirms segregation of the variants with the phenotype.

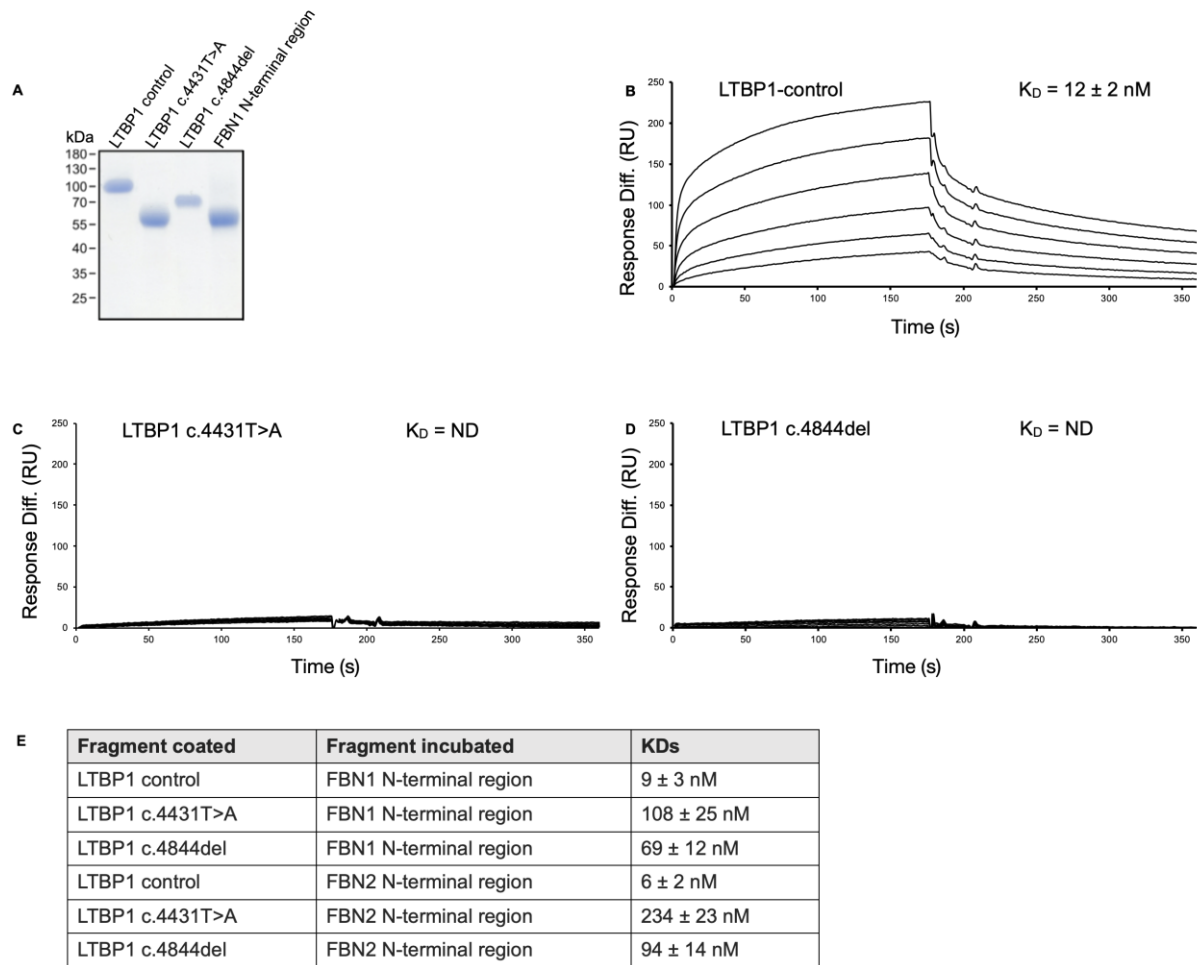

**Figure S2: Binding assays show reduced interaction between the N-terminal fibrillin-1 region and mutant C-terminal LTBP1 regions.** (A) SDS/PAGE of recombinantly expressed and affinity purified C-terminal LTBP1 regions and the N-terminal region of FBN1. (B-D) SPR sensorgrams of the interaction between the C-terminal LTBP1 variants and control (flowed over as soluble analyte) and N-terminal region of FBN1 (immobilized as ligands on sensor chip). ND. Not determinable. (E) Equilibrium dissociation constant solid-phase binding assay from C-terminal LTBP-1 regions carrying the c.4431T>A and c.4844del variants (immobilized) to fibrillin-1 and -2 proteins incubated in solution.

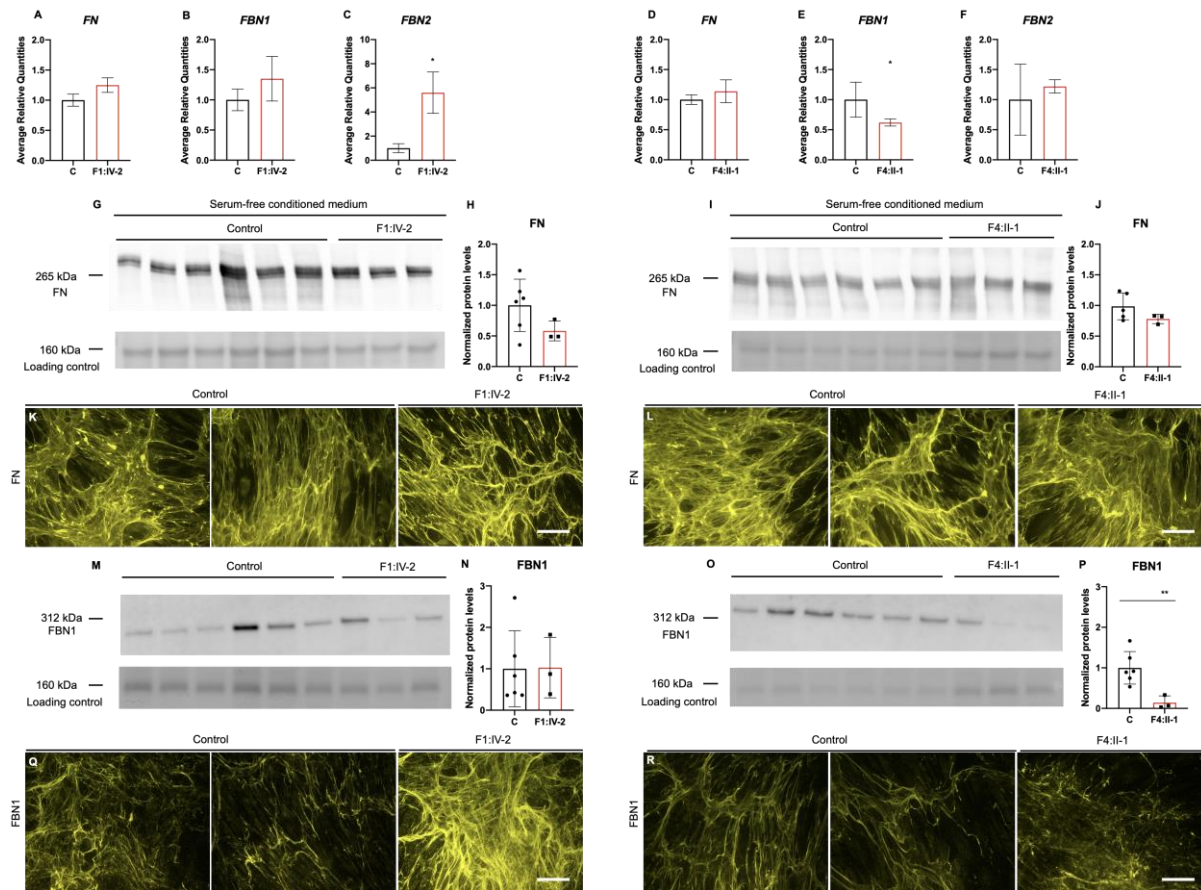

**Figure S3: LTBP1 variants affect the fibrillin but not the fibronectin component of the ECM *in vitro*.** (A-F) Quantification of *FN*, *FBN1* and *FBN2* gene expression dermal fibroblast cultures at 1 dpc derived from affected individuals F1:IV-2 and F4:II-1 and respective control subjects by RT-qPCR. (G,I,M,O) Immunoblot of 14 dpc conditioned media obtained from fibroblast cultures derived from individuals F1:IV-2 and F4:II-1 and respective gender- and age-matched control subjects. Specific antibodies were used to detect FN (G,I) and FBN1 (M,O), and imperial blue staining was used to monitor equal loading. (H,J,N,P) Quantification of protein expression of FN (H,J) and FBN1 (N,P) in conditioned media. (K,L,Q,R) Representative images of immunofluorescent analysis of FN (K,L) and FBN1 (Q,R) in 9 dpc fibroblast cultures derived from affected individuals F1:IV-2 and F4:II-1 and respective control subjects. Scale bar represents 50  $\mu$ m. Data are expressed as mean  $\pm$  standard deviation (SD). \* P-value < 0.05, \*\* P-value < 0.01. Two-tailed unpaired t-test with Welch's correction was used for statistical analysis.



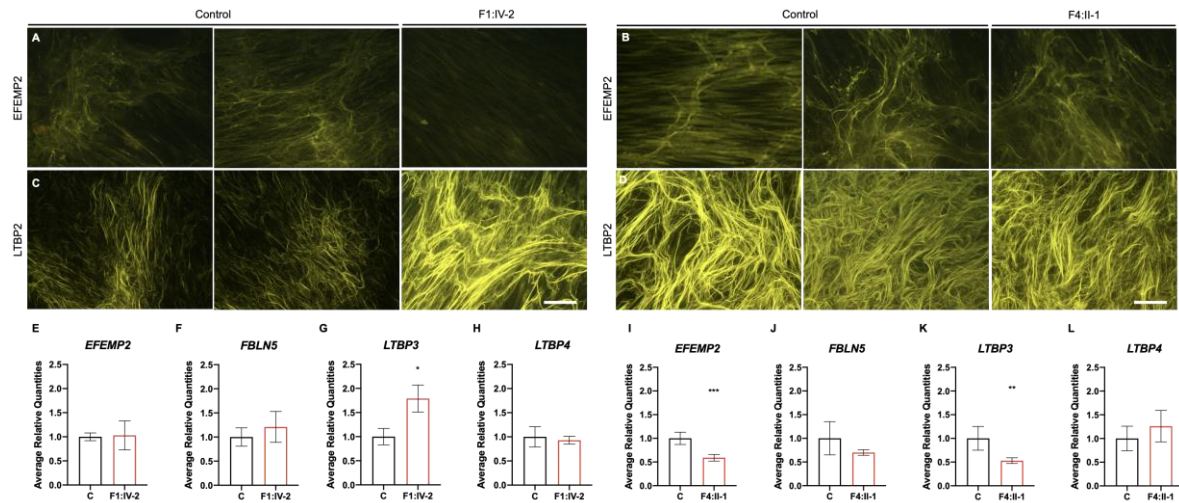

**Figure S4: Specific *LTBP1* variants render different responses of adaptor proteins. (A,B)**

Representative images of immunofluorescent analysis of EFEMP2 in dermal fibroblast cultures derived from individuals F1:IV-2 in A and F4:II-1 in B and their respective control subjects at 9 dpc. (C,D) Representative images of immunofluorescent analysis of LTBP2 in dermal fibroblast cultures derived from individuals F1:IV-2 in C and F4:II-1 in D and their respective control subjects. Scale bar represents 50  $\mu$ m. (E-L) Quantification of *EFEMP2*, *FBLN5*, *LTBP3*, and *LTBP4* gene expression in dermal fibroblast cultures at 1 dpc derived from affected individuals F1:IV-2 and F4:II-1 and respective control subjects by RT-qPCR. Data are expressed as mean  $\pm$  SD. \* P-value < 0.05, \*\* P-value < 0.01, \*\*\* P-value < 0.001. Two-tailed unpaired t-test with Welch's correction was used for statistical analysis.

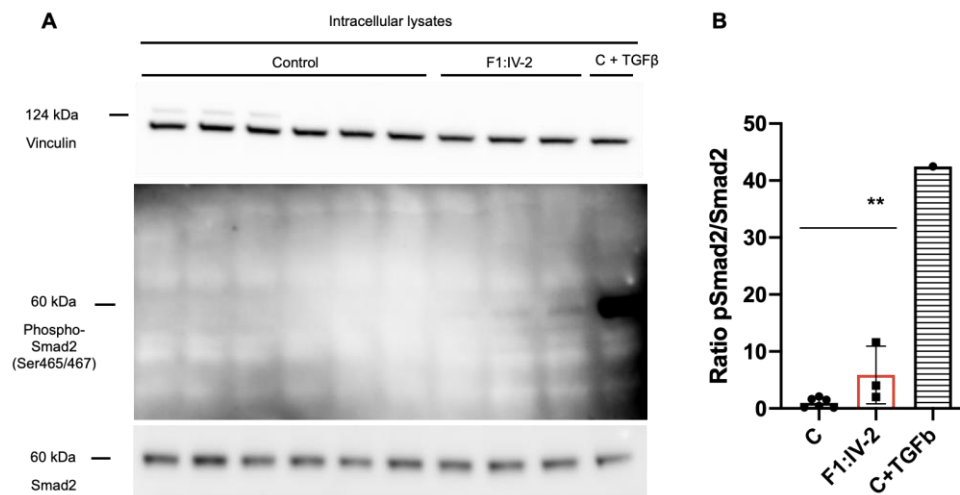

**Figure S5: Immunoblot of (non-)phosphorylated Smad2 levels in F1:IV-2 and respective controls (repeat).** (A) Immunoblot of intracellular lysates at 1 dpc obtained from fibroblast cultures derived from individual F1:IV-2 and respective sex- and age-matched control subjects. One of the control subjects was stimulated with TGFβ as positive control. (B) Band intensities of chemiluminescent signals of non-phosphorylated and phosphorylated Smad2 were quantified with ImageJ. The ratio pSmad2 to Smad2 was normalized to fibroblast cultures derived from sex- and age-matched control subjects. Vinculin was used as loading control. Data are expressed as mean ± SD. \*\* P-value < 0.01. Two-tailed unpaired t-test with Welch's correction was used for statistical analysis.



```

*****
XP_017207300.1 CLPG FILSAQHNYCVPHRQN --- ATSTGTE
NP_996826.3    CLPGYVPSDKPNYCTPL NTA LNLEKDSBLE
NP_000618.4    CLPGYVPSDKPNYCTPL NTA LNLEKDSBLE
*****

```

**Figure S6: Amino acid sequence alignment of LTBP1 between *H. Sapiens* and *D. rerio*.** C-terminal amino acid sequence alignment (Clustal Omega) between *H. sapiens* LTBP-1S precursor [NCBI:NP\_000618.4], *H. sapiens* LTBP-1L precursor [NCBI:NP\_996826.3] and *D. rerio* Ltbp1 [NCBI:XP\_017207300.1] starting from cb EGF-like domain 13. Cb EGF-like domains in *H. sapiens* are highlighted in blue and predicted to be conserved in *D. rerio*. EGF-like domains in *H. sapiens* are highlighted in yellow and predicted to be conserved in *D. rerio*. TGFβ-binding domains in *H. sapiens* are highlighted in red and predicted to be conserved in *D. rerio*. Conservation of amino acid sequences are shown below the alignment: “\*” means residues identical in all sequences in the alignment; “:” means conserved substitutions; “.” means semi-conserved substitutions; space means no conservation. Note that *ltbp1*<sup>-/-</sup>Δ29 zebrafish is lacking 6 domains: 2 predicted TGFβ-binding domains, 3 predicted cb EGF-like domains, and 1 EGF-like domain. *Ltbp1*<sup>-/-</sup>Δ35 zebrafish is lacking 2 domains: 1 predicted cb EGF-like domains, and 1 EGF-like domain.



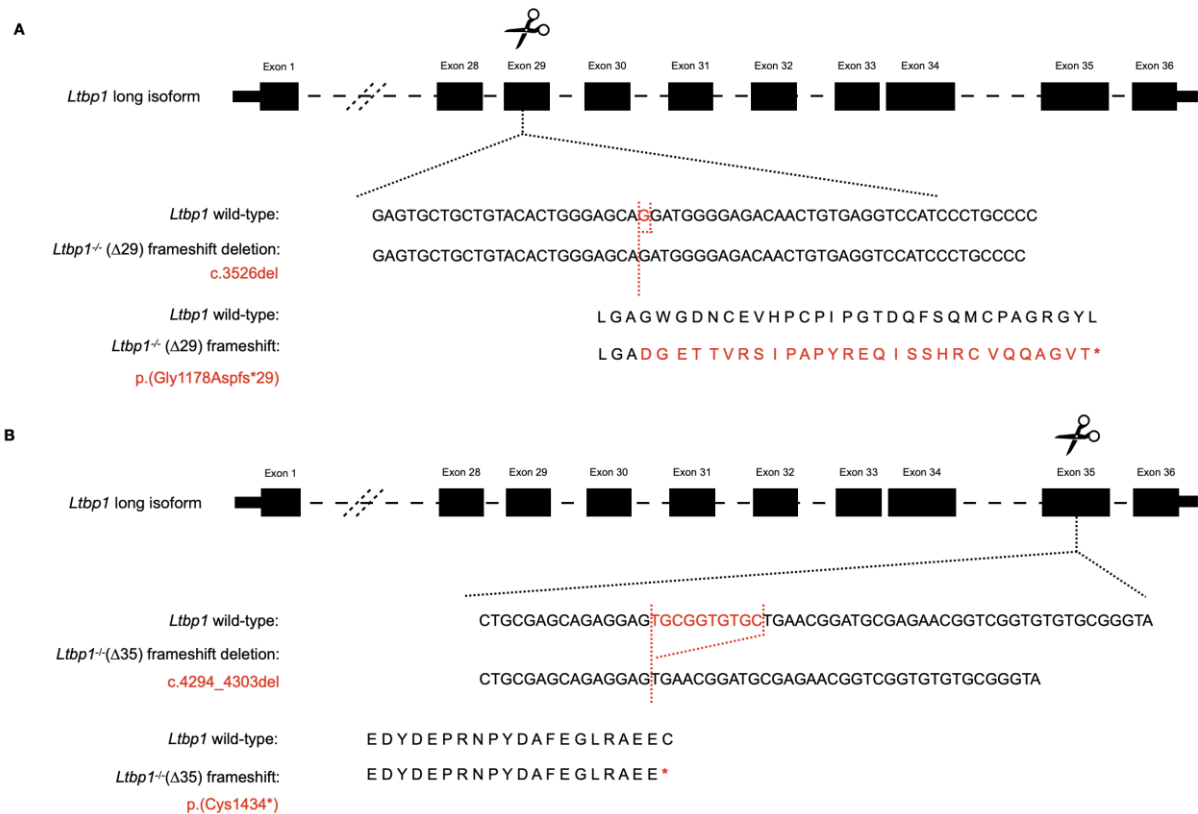

**Figure S7: Schematic illustration of the targeting strategy for the generation of *Ltbp1*<sup>-/-</sup>Δ29 and *Ltbp1*<sup>-/-</sup>Δ35 zebrafish.** (A) A frameshift-inducing 1 bp deletion (c.3526del) was generated in exon 29 of the zebrafish *Ltbp1* gene using CRISPR-Cas9 technology. The deleted nucleotides are marked in red. The frameshift was predicted to cause premature translation termination p.(Gly1178Aspfs\*29). The termination codon (red asterisk) is indicated in the predicted mutated protein sequence. (B) A 10 bp frameshift-inducing deletion (c.4294\_4303del) was introduced in exon 35 of the zebrafish *Ltbp1* gene using CRISPR-Cas9. The deleted nucleotides are marked in red. The frameshift was predicted to cause premature translation termination (p.Cys1434\*). The termination codon is shown in the predicted mutated protein sequence. Nucleotide RefSeq accession number *D. rerio Ltbp1* [NCBI: XM\_017351811.2]. Protein RefSeq accession number *D. rerio Ltbp1* [NCBI: XP\_017207300.1]. The *D. rerio Ltbp1* gene resides on chromosome 17, spans a region of 160 kb and has not been duplicated during teleost evolution.

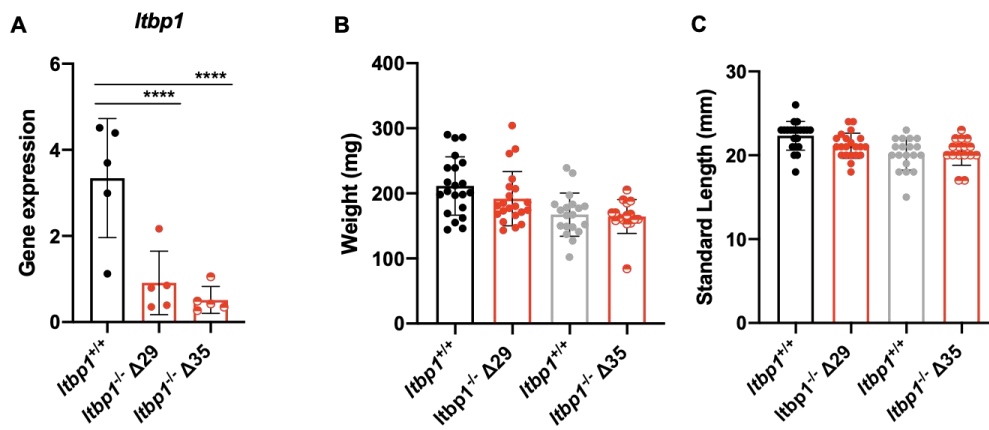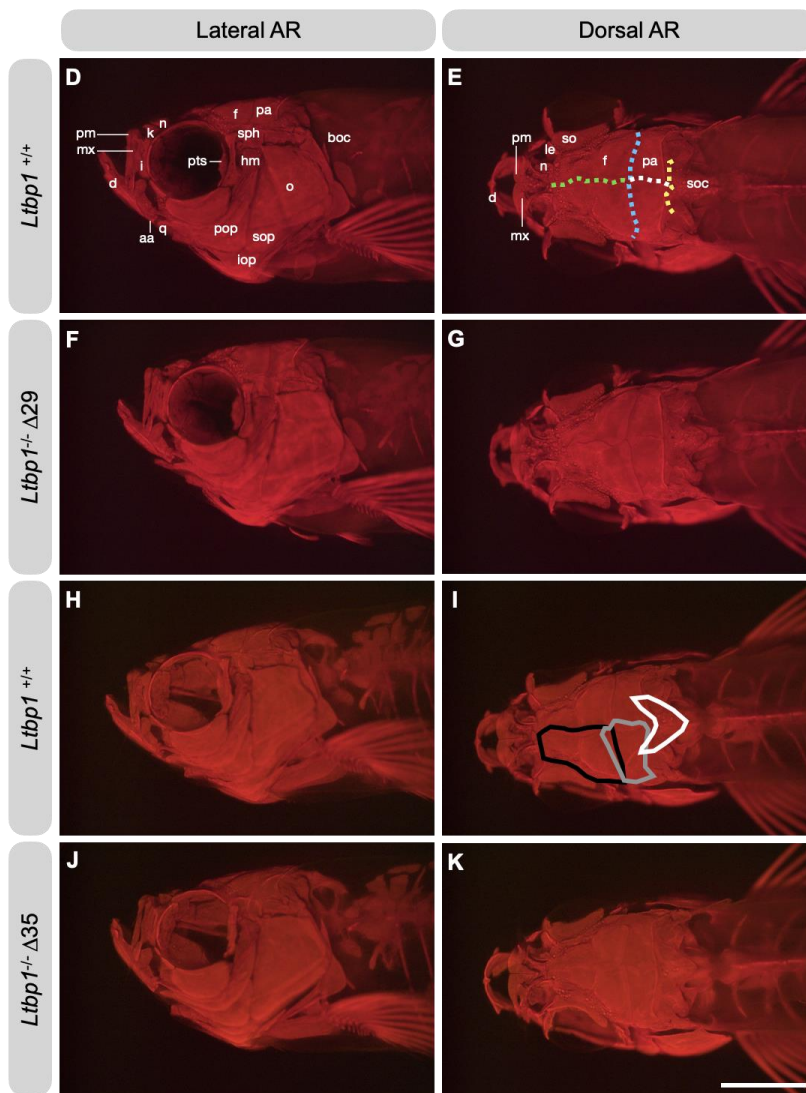

**Figure S8: Adult morphological and craniofacial analysis of *Itbp1*<sup>-/-</sup>Δ29 and *Itbp1*<sup>-/-</sup>Δ35 zebrafish.**

(A) *Itbp1* mRNA levels in *Itbp1*<sup>-/-</sup>Δ29 and *Itbp1*<sup>-/-</sup>Δ35 zebrafish models at 15 dpf specified by RT-qPCR. *Itbp1*<sup>-/-</sup>Δ29 and *Itbp1*<sup>-/-</sup>Δ35 zebrafish had a similar standard length (B) and weight (C) compared to WT siblings at 4 months of age. Representative lateral (D, F, H, J) and dorsal (E, G, I, K) images of adult

cranium stained for mineralized bone with Alizarin Red. Interfrontal suture (green dashed line), coronal suture (blue dashed line), sagittal suture (white dashed line) and lambdoid suture (yellow dashed line) are indicated in E. Frontal (black line), parietal (grey line), and supraoccipital bone (white line) are shown in I. Note that in contrast to humans, the sutures are overlapping in the calvaria of zebrafish. aa: anguloarticular; boc: basioccipital; f: frontal; hm: hyomandibula; i: infraorbital 1; iop: interoperculum; k: kinethmoid; le: lateral ethmoid; mx: maxilla; n: nasal; o: operculum; pa: parietal; pm: premaxilla; pop: preoperculum; pts: pterosphenoid; q: quadrate; so: supraorbital; soc: supraoccipital; sop: suboperculum; sph: sphenotic. Data are expressed as mean  $\pm$  standard deviation (SD). \*\*\*\* P-value <0.0001. One-way ANOVA was used for statistical analysis in A. Two-tailed unpaired t-test was used for statistical analysis in B and C.

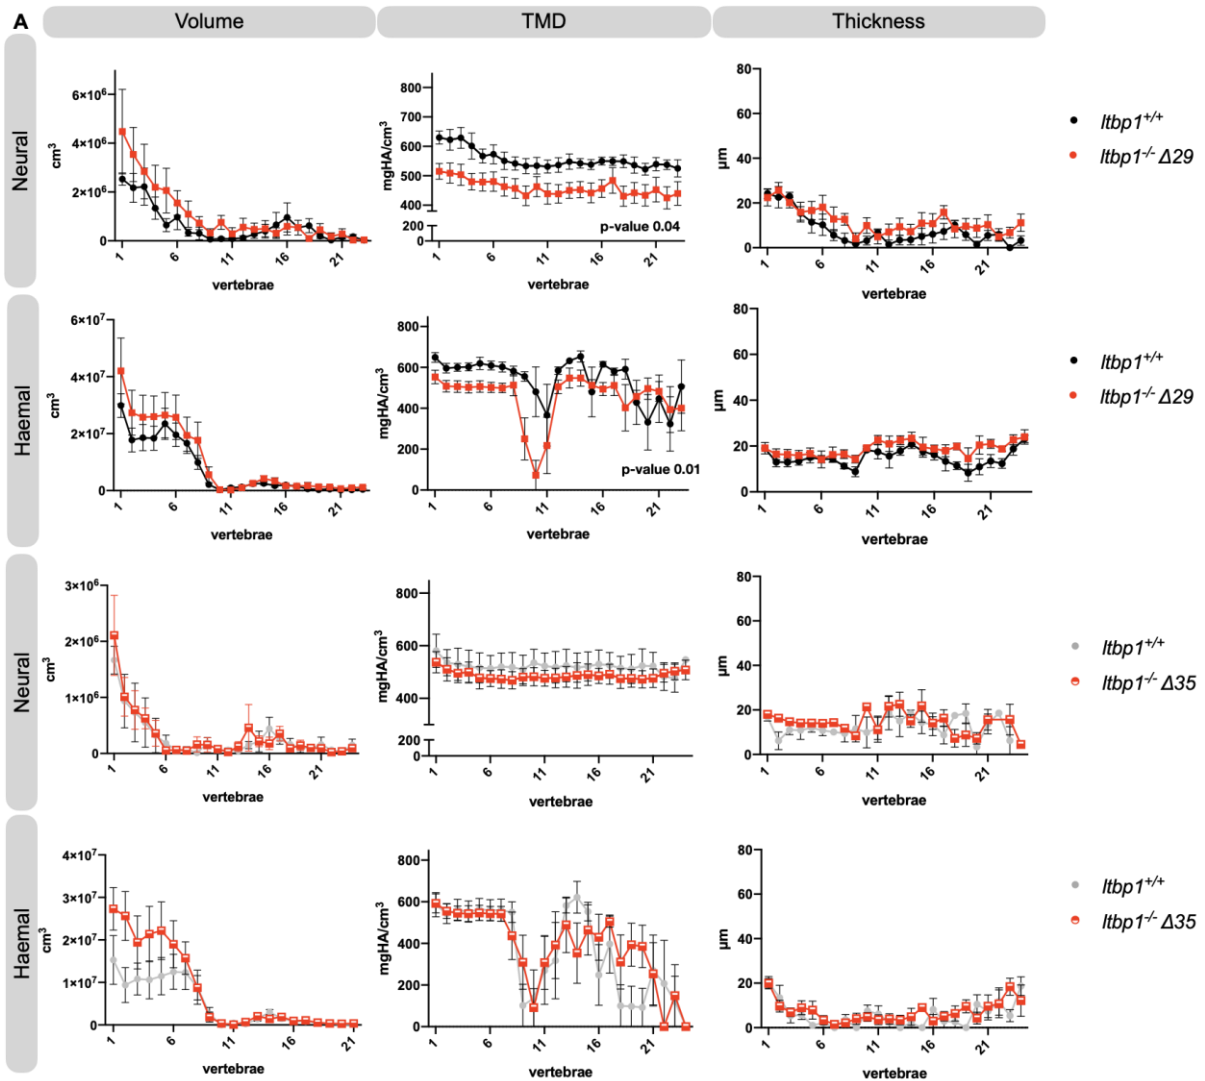

**Figure S9: Loss of both *Itbp1* isoforms in zebrafish causes hypo-mineralization of the neural and haemal associated vertebral elements.** (A) Quantitative  $\mu$ CT analysis of the vertebral column in five *Itbp1*<sup>-Δ29</sup> zebrafish versus five WT siblings and five *Itbp1*<sup>-Δ35</sup> zebrafish versus four WT siblings at the age of four months. The bone volume, TMD and bone thickness was calculated from the neural associated element (neural arch and neural spine) and the haemal associated element (haemal arch and haemal spine). The X-axis represents each abdominal and caudal vertebral body along the anterior-posterior axis. Data are presented as mean  $\pm$  standard error of the mean (SEM). Data were analyzed in the R statistical environment.



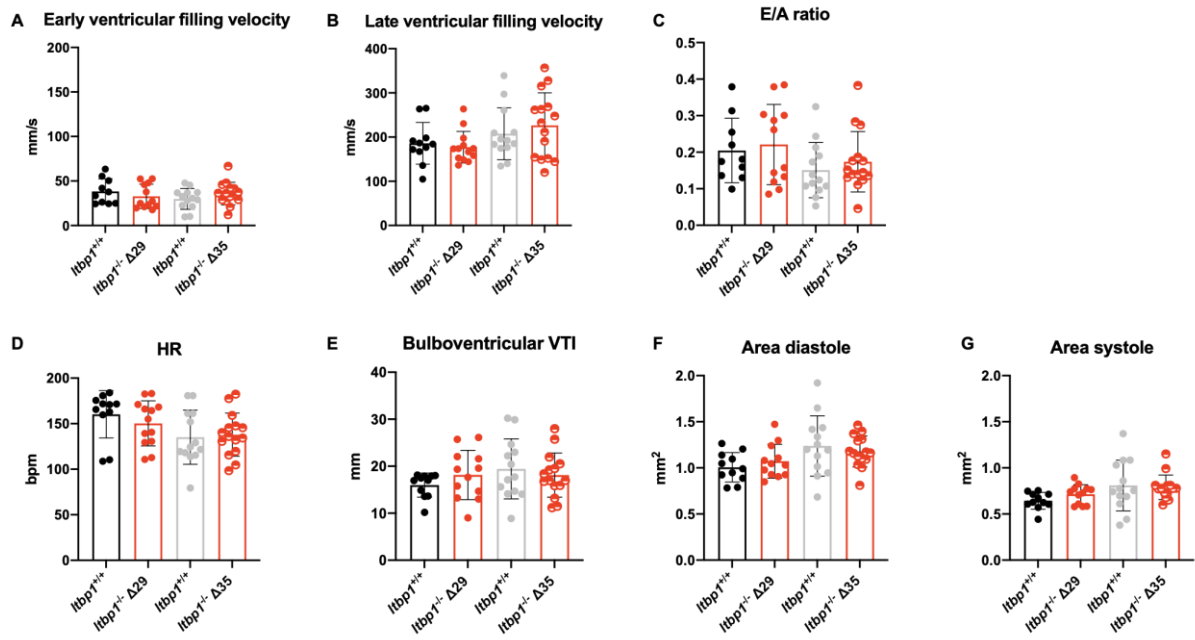

**Figure S10:** (A-G) Parameters obtained from cardiac ultrasound examination of 10-months old *Itbp1*<sup>-Δ29</sup> and *Itbp1*<sup>-Δ35</sup> zebrafish and their respective WT siblings. A: late ventricular filling velocity; bpm: beats per minute; E: early ventricular filling velocity; VTi: velocity time integral. Note that the ventricular outflow is measured during ventricular systole through the bulboventricular valve of the zebrafish heart (similar structure to the aortic valve in humans). Data are expressed as mean  $\pm$  SD. Two-tailed unpaired t-test was used for statistical analysis.

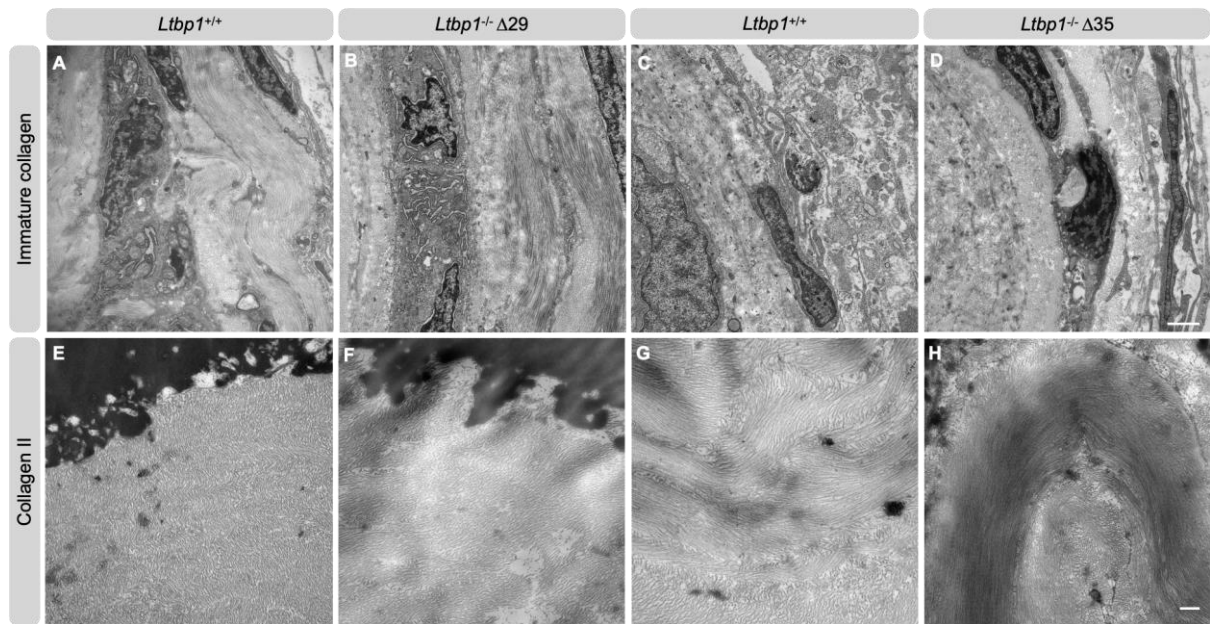

**Figure S11: Ultrastructural analysis of immature collagen and collagen 2 in the intervertebral ligament of adult *ltbp1* mutant and WT zebrafish.** (A-D) Representative images of ultrathin sagittal sections showing internal immature collagen structures of zebrafish intervertebral ligament of 4-6 months old adult *ltbp1*<sup>-/-</sup>Δ29 and *ltbp1*<sup>-/-</sup>Δ35 zebrafish and WT siblings. (E-H) Representative images of ultrathin sagittal sections showing internal immature collagen structures of zebrafish intervertebral ligament of 4-6 months old adult *ltbp1*<sup>-/-</sup>Δ29 and *ltbp1*<sup>-/-</sup>Δ35 zebrafish and WT siblings. Scale = 1 μm in A-D, scale = 200 nm in E-H.

| Dermal fibroblast | Age (years) | Sex    |
|-------------------|-------------|--------|
| Control 1         | 25          | female |
| Control 2         | 25          | female |
| F1:IV-2           | 9           | female |
| Control 3         | 2           | male   |
| Control 4         | 2           | male   |
| F4:II-1           | 1.6         | male   |

**Table S2: LTBP1 mutant and control dermal fibroblasts used in this study**

| Gene Symbol     | Forward primer sequence    | Reverse primer sequence  |
|-----------------|----------------------------|--------------------------|
| <i>YWHAZ</i>    | ACTTTTGGTACATTGTGGCTT      | CCCCCAGGACAAACCAGTAT     |
| <i>HPRT1</i>    | TGACACTGGCAAACAATGCA       | GGTCCTTTTCACCAGCAAGCTA   |
| <i>LTBP1 F1</i> | TGCTGGGAACATCTGAGTGA       | CTGAGCATAGTCATCTGAATCCTT |
| <i>LTBP1 F4</i> | AAGGGGATTTTCAGGAGAGCAG     | CAGGTCACTTTACAGATGCTCG   |
| <i>EFEMP2</i>   | GCCCGAGTGTGTGGACAT         | CAACACAGGAGCGGTTGTTA     |
| <i>FBLN5</i>    | TGGATGAAAGCAACCAATGTGT     | CAATATCCGTCCGTGCAGGA     |
| <i>LTBP3</i>    | GATCGCTCCCACTCAGGTC        | TTGCAGTGGCAGGAGTAGT      |
| <i>LTBP4</i>    | GCCTCTGTGACCAGGGTT         | ATTTTCACACAGGGCAGCTC     |
| <i>FBN2</i>     | AACCGCTGTGCTTGTGTTTAT      | TCTGGTTGTTGACCTGAGTGA    |
| <i>FN</i>       | GAACAAACACTAATGTTAATTGCCCA | GAGACATGCTTGTTCCTCTGG    |
| <i>LOX</i>      | TATGGCTACCACAGGCGATT       | GTCTGCACCATAGGTATCATAACA |
| <i>COL1A1</i>   | GTACAGAACGGCCTCAG          | GTTCTTGGTCTCGTCACA       |
| <i>COL1A2</i>   | CCTAACCAAGGATCGACTAT       | GCCATTTCTTGGAAAGTCA      |
| <i>COL3A1</i>   | GAGGATGGTTGCACGAAACA       | TGATCAGGACCACCAATGTCA    |
| <i>POSTN</i>    | TCTGTGCCCTTCAACAGATTTT     | GCAGCCTTTTCATTCCCTCCATT  |
| <i>CTGF</i>     | GGTTACCAATGACAACGCCT       | GATGCACTTTTTGCCCTTCTTAAT |
| <i>SERPIN1</i>  | GATTCAAGATTGATGACAAGGGC    | TGTGGTGCTGATCTCATCCTT    |
| <i>Itbp1</i>    | ATACACCTGTGACTGCTTCGAT     | AGCTCGGAGCATTGCTTGATA    |

**Table S3: Primer sequences for qPCR analysis**

| Zebrafish line                | Forward primer sequence | Reverse primer sequence |
|-------------------------------|-------------------------|-------------------------|
| <i>Itbp1<sup>-/-</sup>Δ29</i> | GGCAGCGTACATCTCCAAAT    | TTTCTCTCCTGCCAGATCGT    |

---

***Itbp1*<sup>-Δ35</sup>**

ACTTGCTTTAAACCCCTCTGTC

TCTGCCTGCAGCTTTTCTCA

---

**Table S4: Primer sequences for genotyping**
